# Supplementary material for: 100+ years of recomputed surface wave magnitude of shallow earthquakes
Source: Copernicus journal article supplement (doi:10.5194/essd-2021-266), 2021-08-17
Supplement: Supplementary file [file essd-2021-266-AC4-supplement.pdf]

# **Author's Response to Emmanuel Scordilis (RC3) (PAPER: <https://doi.org/10.5194/essd-2021-266>)**

Domenico Di Giacomo & Dmitry A. Storchak

November 2021

We thank the reviewer #3, Emmanuel Scordilis for his comments and suggestions. Below we reply in detail to each point showing the Referee Comments (RC) in bold and the Author Response (AR) in italic. The revised version of the manuscript (annotated manuscript after our answers) is appended as well.

**RC:**

## **A. General Comment**

**Earthquake catalogs, extending over a wide period and covering the globe are useful tools for many studies. Two are the critical preconditions that must be fulfilled: accuracy in their focal parameters and homogeneity regarding the scale in which their magnitudes are expressed. Considering the fact that it is not suffering saturation but only at its large values, Ms is a suitable magnitude for such studies.**

**In this spirit, I believe that this work is very useful and it is my sense that its outcome (the catalog) is going to be extensively used in the future.**

**The paper is well written and its content corresponds to its title. There are some minor issues that I will describe below, which, if clarified, I believe will further improve the manuscript.**

**Concluding, it is my opinion that the manuscript can be accepted for publication after some minor revision.**

*We thank the reviewer for the positive general comments.*

**Following are my comments in details.**

## **B. Specific Comments**

- 1. In the 1<sup>st</sup> paragraph of "Introduction" the basic pros of surface wave magnitude, Ms, are mentioned. I believe that the cons (e.g. inability of Ms estimation by using records of short period instruments and, therefore, of small local earthquakes, possible underestimation for very strong earthquakes) should be mentioned too.**

*We have added the following sentences in the Introduction:*

*"However, as any magnitude type, MS has also shortcomings, such as the possible underestimation for some large earthquake (as discussed later), the*

*inability of processing surface waves from short-period instruments (hence for many small local earthquakes) and the limitation, at least in standard procedures (IASPEI, 2013), of being defined for shallow earthquakes.”*

**2. Page 3: In the square root, the factor “2” must be out of the brackets:**

$$\left(\frac{A}{T}\right)_H = \sqrt{2 \cdot \left(\frac{A}{T}\right)_{N/E}^2}$$

*We thank the reviewer for pointing out the typeset error.*

**3. How have you estimated the final surface wave magnitude if more than one Ms values were available? Mean value? Weighted mean? Have you applied any filters to avoid contamination that could be caused by one or more potentially incorrect magnitude values that may deviate significantly from the majority of the rest?**

*We do not average MS computations from different sources, but recompute MS using the station data available to us. This is outlined in detail in the text.*

**4. The final catalog includes only events with recomputed Ms magnitudes, meaning that this catalog is not complete, as it possibly misses earthquakes which could be included in catalogs published by other authors, covering wide regions and extending over wide time periods, but with magnitudes consistent (not original) to the standard Ms, (e.g. Karnik 1996).**

*This is true to some extent, and we acknowledge the fact the dataset presented here can be improved given time and resources. However, we have strong reasons to list only earthquakes that are backed up by station data (hence we say “recomputed MS”). We are aware of the work of Karnik and all earthquakes that 1) have station data to validate the occurrence of an earthquake, 2) allow relocation and MS recomputation, if enough station data is available, are included in our dataset. The requirement of station data is of paramount importance as, particularly in the pre-digital period, earthquakes from different sources contain errors, at times significant. A striking example is the case of the fake M8.2 Peru earthquake in 1908 studied by Di Giacomo and Dewey (2020). Hence, we avoid for this dataset to include earthquakes as listed from other sources where we do not have data or not enough quality data to reprocess the event and obtain our own instrumental solution.*

**5. In lines 72-74 you mention that: “The locations adopted in this work come from the ISC- GEM Catalogue (Bondár et al., 2015; Di Giacomo et al., 2018) between 1904 and 1963 and the rebuilt ISC Bulletin (Storchak et al., 2017, 2020) from 1964 onward”. Looking in the ISC-GEM catalog I could not find some earthquakes included in your catalog. Indicatively I mention the following events: 1904-12-02, 02:19:12; 1904-12-11,**

**17:05:42; 1908-01-31, 04:49:15 etc. These events are also not included in the online ISC bulletins. Figure 3 clearly shows that data before ~1950 are coming exclusively from ISC. So, which is their origin?**

*The ISC-GEM Catalogue is composed of two files, one for the main catalogue and a supplementary file listing earthquakes with low quality location and/or low quality Mw. Most of the earthquakes in the supplementary file have no Mw at all but it can happen that Mw, as converted from MS, is of low quality and hence an earthquake is not considered good enough to be listed in the main catalogue file. Such details are described in Di Giacomo et al. (ESSD 2018). The earthquakes mentioned by the reviewer are all in the supplementary file of the ISC-GEM Catalogue and not yet included in the ISC Bulletin. Therefore, we do not consider necessary to change the text.*

- 6. Chapter 4 entitled “Catalogue Properties” gives a detailed and very useful analysis of the time-history of Ms scale. However, it looks there are four gaps regarding earthquakes of  $M_s < 6.0$  that can be observed in figure 10: one at ~1920, the second during 1940-1950, the third between 1960 and 1978 and the fourth between 1980 and 1984. The authors are right about the impact of World War 2, which justifies the second gap. According to the authors (see chapter 6), there is further work to be done that will possibly allow some of the above gaps to be covered. So, consider this as just a remark.**

*To answer also a remark by another reviewer we have extended the discussion on the fluctuations of the MS dataset content in different years and added the following sentences regarding the period 1960-1977:*

*“The period 1960-1977 also features less earthquakes below 5.5 than previous and following decades. This is due both to the limited number of stations available and the fact that we digitized surface wave data from the 1960s printed station bulletins only for earthquakes selected in the first version of the ISC-GEM Catalogue (magnitude 5.5 and above, Storchak et al., 2013). In Section 6 we propose activities that are likely to mitigate significantly the deficiencies of the ISC MS dataset in most of the 1960s-1970s.”*

- 7. In the same chapter (4) and in lines 160-170 there is an analysis of the features of the formed catalog. It is mentioned there how the completeness magnitude,  $M_c$ , is distributed over time. There is a point here that, in my opinion, needs clarification. To proceed to a meaningful  $M_c$  estimation and to study its variation with time it is necessary to know first if there are earthquakes systematically missing from the data set. I mean, are there any earthquakes whose focal parameters are known but they are not included in the catalog because it was not possible to have  $M_s$  estimation for them? If yes, then I believe that the term “completeness magnitude” should be avoided as, at least literally, it has another meaning.**

All earthquake catalogues have missing earthquakes. However,  $M_c$  estimations are still useful to emphasize strengths and weaknesses of an earthquake catalogue. The purpose of our analysis is just that, and we feel that it has value for the reader and dataset user. Nevertheless, we are confident that we do not systematically miss earthquakes with magnitude above 6 from the 1920s-1930s and 7+ from 1905 (meaning some poorly recorded individual earthquakes may be missing, but not systematically). Also, apart from a few exceptions, we are confident that at this point if we were not able to recompute  $M_S$  then the earthquake is likely below the  $M_c$  estimation provided at a given time. In addition, please note that we include earthquakes relocated with depth down to 60 km, and other catalogues may have different depths for the same earthquake which may lead to  $M_S$  being allowed or not. Still, we think that an  $M_c$  estimation is possible and useful even if earthquakes are missing.

**8. Figure 11 & Lines 180-190 (a follow up of the previous comment): The rates shown in figure 11 do not necessarily show variation of completeness magnitudes over time.**

Our aim with Figure 11 is to update and compare the seismicity rate estimations from previous works with our dataset. We consider magnitude thresholds quite high ( $M_S$  6, 6.5 and 7), where we can be more confident that our dataset is mostly complete. As such, we feel that Figure 11 carries important information and address some misleading results in previous papers.

**9. Figure 12: The  $M_s$  underestimation for very strong earthquakes (e.g.  $M > 8.0$ ) has been already observed and noticed (e.g. Heaton et al., 1986). For the example of the magnitude of the Aleutian earthquake of April 11, 1946, the magnitude reports in the ISC bulletin are:  $M_s=7.3$  (after Abe, "Phys. Earth planet. Interiors", 1981);  $M_s=7.1$  &  $M_w=8.0$  (after Pacheco & Sykes, "Bull. Seism. Soc. Am.", 1992);  $M_w=8.6$  (after López & Okal, "Geophys. J. Int.", 2006). These values are clearly showing (as the authors of this manuscript state) that  $M_s$  values underestimated the real magnitude of this great event. Therefore, although the data in figure 12 are not many, it can be stated that the "saturation" of  $M_s$  for values over  $\sim 8.0$  is confirmed here and should therefore be considered as a fact.**

In line with a remark by another reviewer we have slightly changed the discussion regarding the  $M_S$  "underestimation" and point out that the largest differences occur for the so-called tsunami earthquakes, like the 1946 Aleutian earthquake. However, we reaffirm that this more an extreme occurrence rather the rule, hence we stand by our choice of suggesting of speaking of " $M_S$  underestimation" rather than " $M_S$  saturation".

### C. Technical Corrections

I could not make it to locate in the text the following two references (included in the "References"):

**1) Line 339: Bormann (2012)**

*This reference to Bormann (2012) is in Figure 2 caption.*

**2) Line 350: Di Giacomo and Storchak (2016)**

*This reference to Di Giacomo and Storchak (2016) is in Figure 1 caption.*

# 100+ years of recomputed surface wave magnitude of shallow global earthquakes

Domenico Di Giacomo<sup>1,\*</sup> and Dmitry A. Storchak<sup>1</sup>

<sup>1</sup>International Seismological Centre (ISC), Pipers Lane, Thatcham, Berkshire, RG19 4NS, United Kingdom

**Correspondence:** Domenico Di Giacomo (domenico@isc.ac.uk)

**Abstract.** Among the multitude of magnitude scales developed to measure the size of an earthquake, the surface wave magnitude  $MS$  is the only magnitude type that can be computed since the dawn of modern observational seismology (beginning of the 20<sup>th</sup> century) for most shallow earthquakes worldwide. This is possible thanks to the work of station operators, analysts and researchers that performed measurements of surface wave amplitudes and periods on analogue instruments well before  
5 the development of recent digital seismological practice. As a result of a monumental undertaking to digitize such pre-1971 measurements from printed bulletins and integrate them in parametric data form into the database of the International Seismological Centre (ISC, [www.isc.ac.uk](http://www.isc.ac.uk), last access: August 2021), we are able to recompute  $MS$  using a large set of stations and obtain it for the first time for several hundred earthquakes. We summarize the work started at the ISC in 2010 which aims to provide the seismological and broader geoscience community with a revised  $MS$  dataset (i.e., catalogue as well as the under-  
10 lying station data) starting from December 1904 up to the last complete year reviewed by the ISC (currently 2018). This  $MS$  dataset is available at the ISC Dataset Repository at <https://doi.org/10.31905/0N4HOS2D>.

## 1 Introduction

Since its introduction, the surface wave magnitude  $MS$  has been very popular and for a long period of time, before the moment magnitude  $M_w$  was introduced by Kanamori (1977) and Hanks and Kanamori (1979), it was considered the most reliable  
15 magnitude to estimate an earthquake size. Its popularity originated due to: 1) as opposed to the magnitude concept introduced at a local scale by Richter (1935),  $MS$  allows seismologists to compute magnitudes for earthquakes worldwide, including those recorded at teleseismic distances (i.e., from 20° onward), without relying on local recordings that were not available in most seismic zones; 2) thanks to the work of station operators, analysts and researchers at various observatories around the world that produced readings of surface wave data for shallow earthquakes since the beginning of the last century,  $MS$  can  
20 be computed (systematically) since the dawn of instrumental seismology (Fig. 1). In addition,  $MS$  is probably the only type of earthquake magnitude that can be computed systematically for all damaging earthquakes for the last 100+ years. However, as any magnitude type  $MS$  has also shortcomings, as the possible underestimation for some large earthquake (as discussed later), the inability of processing surface waves from short-period instruments (hence for many small local earthquakes) and the limitation, at least in standard procedures (IASPEI, 2013), of being defined for shallow earthquakes.

25 Gutenberg (1945), using measurements of amplitudes and periods of surface waves accumulated during the first 40 years of the last century, introduced  $MS$  as:  $MS = \log A + 1.656 \log \Delta + 1.8$ . Since then a team of researchers from Moscow and Prague further developed Gutenberg's work and proposed the formula (Kárník et al., 1962; Vaněk et al., 1962):  $MS = \log(\frac{A}{T})_{\max} + \sigma_S(\Delta) = \log(\frac{A}{T})_{\max} + 1.66 \log \Delta + 3.3$ , where  $A$  and  $T$  are the amplitude (in  $\mu m$ ) and period (in *seconds*) of the surface wave train, respectively, and  $\Delta$  is the distance in degrees of the seismic station from the earthquake epicentre (distance and period  
30 limits will be discussed in the next section). This is the so-called Moscow-Prague formula and it was accepted as the standard for  $MS$  computation by the International Association of Seismology and Physics of the Earth's Interior (IASPEI, <http://www.iaspei.org/>, last access: August 2021) at the 1967 Zürich meeting (Bormann et al., 2012; IASPEI, 2013). The calibration function  $\sigma_S(\Delta)$  and its best fit up to  $160^\circ$  ( $1.66 \log \Delta + 3.3$ ) are shown in Fig. 2.

Several earthquake catalogues that listed  $MS$  have served the seismological community for various purposes in the past  
35 decades. One that has been instrumental for many studies is Abe's catalogue (Abe, 1981; Abe and Noguchi, 1983a, b; Abe, 1984). This catalogue lists  $MS$  values for large earthquakes (mostly  $MS > 6.5$ ) up to 1980 and its reliability was recently confirmed by Di Giacomo et al. (2015a). Since then researchers have extend Abe's catalogue beyond 1980 with  $MS$  solutions from the International Seismological Centre (ISC, [www.isc.ac.uk](http://www.isc.ac.uk), last access: August 2021) and/or the National Earthquake Information Center of the USGS (<https://earthquake.usgs.gov/earthquakes/search/>, last access: August 2021). Such a composite  
40  $MS$  catalogue was then used as the magnitude basis for recent compilations such as the Centennial Catalogue (Engdahl and Villaseñor, 2002) and PAGER-CAT (Allen et al., 2009) as well as various types of research, from calibration purposes (Herak and Herak, 1993; Rezapour and Pearce, 1998) to patterns of the Earth's seismicity (e.g., Pérez and Scholz, 1984; Ogata and Abe, 1991; Pacheco and Sykes, 1992; Pérez, 1999).

Considering the important legacy of  $MS$  in the seismological community, here we present a revised  $MS$  catalogue ~~of~~ [\(cut-off magnitude of 4.5\) listing](#) over 46,000 earthquakes ~~with  $MS \geq 4.5$  and as well as~~ the underlying station data (files described in Section 8) used to derive  $MS$  for each earthquake. Hereafter we refer to the catalogue and underlying station data as ISC  $MS$  dataset (International Seismological Centre, 2021d). To create this product we benefit from the work done by Di Giacomo et al. (2015b, 2018) to digitize [\(i.e., converted from printed to computer accessible format\)](#) a large volume of surface wave parametric data prior to 1971 and by Storchak et al. (2017, 2020) to rebuild the ISC Bulletin from 1964 onwards.  
45

50 We first recall the basic steps in our procedure to compute  $MS$  and outline the major features of the station data behind the calculation of the network  $MS$ . Then we discuss some properties of the ISC  $MS$  dataset in terms of completeness and rates in different time periods. Finally, we briefly discuss the largest earthquakes ever recorded and outline further activities that could improve this dataset in different time periods.

## 2 [Recomputing Reporters and \$MS\$ recomputation](#)

55 [A big part of the ISC mission consists of collecting and reprocessing reports from seismological agencies all over the world to produce the ISC Bulletin \(International Seismological Centre, 2021c\). Details about agencies contributing data to the ISC can be found at <http://www.isc.ac.uk/iscbulletin/agencies/>, last access: August 2021. The summary of the agencies \(hereafter](#)

also referred to as reporters or data contributors) that contributed surface wave parametric data to create the ISC  $MS$  dataset is shown in Fig. 3. A few aspects are worth mentioning regarding the surface wave data reporters.

60 Originally, the ISC had no surface wave data available in digital form for pre-1971 earthquakes. Hence, to fill this data gap, an onerous undertaking of digitizing surface wave data from station/network printed bulletins began in 2010 (Di Giacomo et al., 2015b, 2018). As shown in Fig. 3, this effort resulted in the ISC having digitized surface wave data from a total of 282 stations for over 12,000 earthquakes (it is our intention to continue this effort, see Section 6).

65 Between 1971 and 1998 the ISC Bulletin contains surface wave data from 457 stations worldwide. However, in this time period we cannot associate such data to specific reporters (hence reporter = UNK, unknown, in Fig. 3). The only exceptions to that are data reports (e.g., agency MOS, JEN, CLL) parsed in the ISC Bulletin during the Rebuild project (Storchak et al., 2017, 2020). Since 1999, coinciding with a major update in ISC data collection procedures and the setup of the ISC database, we are able to routinely associate station data with their agency. Only 30 reporters out of about 150 contributed surface wave data in the last 20 years, with the largest contributors being IDC, NEIC, MOS and BJI (Fig. 3).

70 Our approach to computing  $MS$  closely follows the standard ISC procedure (Bondár and Storchak, 2011) and is already detailed in Di Giacomo et al. (2015a). However, it is beneficial here to 1) recall some aspects of the procedure in light of the content of station data files (Section 8), and 2) explain some necessary deviations from it.

First, we consider the surface wave data belonging to a reading (in ISC jargon a reading groups all parametric data from a single station associated to a specific seismic event and reported by the same agency). A reading can have any number of surface wave data entries and different reporters may provide a reading for the same station. An example of a reading is shown in Table 1 for station CLL (Collm, Germany) for an earthquake which occurred in the Northern Mid-Atlantic Ridge, 24 September 1969. We have chosen this example as the reading lists multiple surface wave data entries on all three components. Within the surface wave phases of the reading ( $L$  in our example), we first search for the maximum of  $\frac{A}{T}$  on the vertical component, and, if available, the component magnitude  $MS_Z$  is obtained via the Moscow-Prague formula. Then, for periods within  $\pm 10$  seconds of  $T$  on the vertical component, the maximum of  $\frac{A}{T}$  for the horizontal vector component  $\sqrt{(\frac{A}{T})_N^2 + (\frac{A}{T})_E^2}$  is searched to calculate the component  $MS_H$  magnitude. If one of the two horizontal components is not available then  $(\frac{A}{T})_H = \sqrt{(2 * \frac{A}{T})_N|E}$ .  $(\frac{A}{T})_H = \sqrt{2 * (\frac{A}{T})_N|E}$ . Although our procedure finds the maximum of  $\frac{A}{T}$  within the reading, a reporter may have provided single component measurements of  $\frac{A_{max}}{T}$ . In our CLL reading example the maximum  $\frac{A}{T}$  on the vertical component is defined by  $ampid = 601627636$ , whereas  $ampid = 601627639$  and  $601627638$  on the North-South and East-West component, respectively, define the maximum horizontal vector component. Such defining entries are included in the station data files (more details in International Seismological Centre, 2021d). Then the  $MS$  for the reading is computed as  $(MS_Z + MS_H)/2$  if both exists, or  $MS = MS_Z|H$  if one of them is not available. If more than one reading  $MS$  exists for a station, the median of the readings  $MS$  is used as station  $MS$ . Finally, the network  $MS$  is computed as the median of the stations  $MS$  if at least three or five station magnitudes are available prior or since 1971, respectively. The uncertainty of the network  $MS$  is expressed as standard median absolute deviation (SMAD) of the  $\alpha$ -trimmed station magnitudes ( $\alpha = 20\%$ ).



In line with IASPEI recommendations (IASPEI, 2013), we only allow *MS* for earthquakes with depth  $\leq 60$  km. The locations adopted in this work come from the ISC-GEM Catalogue (Bondár et al., 2015; Di Giacomo et al., 2018) between 1904 and 1963 and the rebuilt ISC Bulletin (Storchak et al., 2017, 2020) from 1964 onward.

Standard procedures at the ISC consider surface wave periods between 10 and 60 seconds and distances between  $20^\circ$  and  $160^\circ$ . Such delta-period ranges are also adopted here for earthquakes which occurred after 1963 (hereafter also referred to as standard delta-period ranges). Prior to 1964 we expand the period and distance ranges to 5-60 seconds and  $2^\circ$ - $180^\circ$ , respectively, as discussed in Di Giacomo et al. (2015b). The augmentation of the delta-period limits prior to 1964 is mainly due to the relative scarcity of surface wave data in the first part of the last century compared to its second half (hence the need for not discarding station *MS*), and to changes in seismological practice in many institutes coinciding with the introduction of the World-Wide Standardized Seismograph Network (WWSSN, Oliver and Murphy, 1971; Peterson and Hutt, 2014). When stations beyond  $160^\circ$  are used we use the tabulated values of  $\sigma_S(\Delta)$  instead of its best-fit (Fig. 2), as recommended by Bormann et al. (2012). In the next section we show that the amplitude/period measurements prior to the WWSSN introduction justifies our delta-period expansion for pre-1964 earthquakes.

### 3 Station data

~~A big part of the ISC mission consists of collecting and reprocessing reports from seismological agencies all over the world to produce the ISC Bulletin (International Seismological Centre, 2021c). Details about agencies contributing data to the ISC can be found at , last access: August 2021. The summary of the agencies (hereafter also referred to as reporters or data contributors) that contributed surface wave parametric data to create the ISC *MS* dataset is shown in Fig. 3. A few aspects are worth mentioning regarding the surface wave data reporters.~~

~~Originally, the ISC had no surface wave data available in digital form for pre-1971 earthquakes. Hence, to fill this data gap, an onerous undertaking of digitizing surface wave data from station/network printed bulletins began in 2010 (Di Giacomo et al., 2015b, 2018). As shown in Fig. 3, this effort resulted in the ISC having digitized surface wave data from a total of 282 stations for over 12,000 earthquakes (it is our intention to continue this effort, see Section 6).~~

~~Between 1971 and 1998 the ISC Bulletin contains surface wave data from 457 stations worldwide. However, in this time period we cannot associate such data to specific reporters (hence reporter = UNK, unknown, in Fig. 3). The only exceptions to that are data reports (e.g., agency MOS, JEN, CLL) parsed in the ISC Bulletin during the rebuild project (Storchak et al., 2017, 2020). Since 1999, coinciding with a major update in ISC data collection procedures and the setup of the ISC database, we are able to routinely associate station data with their agency. Only 30 reporters out of about 150 contributed with surface wave data in the last 20 years, with the largest contributors being IDC, NEIC, MOS and BJI (Fig. 3).~~

The decadal spatial distribution of the stations contributing to the ISC *MS* dataset is summarized in Figs. 4-5. At times we mention seismic stations that, for sake of brevity, we may only identify by their code (station's full details can be accessed at International Seismological Centre, 2021b).

Not surprisingly, the *MS* network geometry is unbalanced as the Northern hemisphere features many more stations than the Southern one (a known issue in every aspect of instrumental seismology). In more detail, these figures highlight how the *MS* network became more dense and widespread over time after most of the stations were located in Europe at the beginning of the last century. Indeed, most of the *MS* in the first two decades of the last century heavily rely on stations in Germany (e.g., GTT, JEN), UPP in Sweden, and a few others (e.g., DBN in Netherlands and PUL in Russia). From the 1920s to the 1960s the station density increased in Europe and in former Soviet Union territory. North American stations also contributed but for a small number of earthquakes.

The Southern hemisphere had only a handful of *MS* reporting stations up to the 1970s-1980s. However, thanks to the extraordinary efficiency in observatory practice at the Observatorio San Calixto (LPZ, Bolivia, opened in 1913, Coenraads, 1993) and Riverview (RIV, Australia, opened in 1909, Drake, 1993), both from the Jesuit network (Udias and Stauder, 1996), our capabilities of obtaining *MS* improved significantly in the first half of last century both for Southern hemisphere and worldwide earthquakes, as was noted by Gutenberg and Richter (1954).

From the 1970s, when surface wave data started to be digitally available in the ISC Bulletin, we witness a significant increase in the *MS* network coverage, particularly in the last two decades, where many more stations in the Southern hemisphere have contributed to *MS*. However, their spatial distribution is not yet as dense as in North America or the Euro-Mediterranean area.

To summarize the evolution of the *MS* network over the decades, Fig. 6 shows the network *MS* decadal box-and-whisker plot of the number of stations (*Nsta*) and secondary gap (i.e., the largest azimuthal gap filled by a single station in which only one station exists, and the quality of the data at that station may bias the solution). The latter parameter is normally used as a network geometry parameter in earthquake location (Bondár et al., 2004), but here it is used as a measure of the azimuthal coverage of the station contributing to *MS* computation (both gap and secondary gap are included in the *MS* catalogue file). Ideally, the station distribution should sample the focal sphere from different azimuth to reduce the effects of the propagation path heterogeneities and radiation pattern (von Seggern, 1970) on the network *MS*, although the latter is symmetric for surface waves (either two-lobed or four-lobed). In light of the station distributions shown in Figs. 4-5, it is not surprising that for most of the last century the secondary gap is usually 180°-270° or above, meaning that the stations contributing to the network *MS* are often located in a narrow azimuth. However, significant improvements To showcase the possible effects of this aspect, in Fig. A1 we show the azimuthal distribution of the station *MS* for the 1960-03-20 off east coast of Honshu earthquake (event 878564). Most of the *MS* stations are located in Europe and it appears that those are responsible for making the network *MS* = 7.9, as most of the station magnitudes at different azimuth are well below the final network *MS*. Nevertheless, significant improvements in the station azimuthal coverage occur from the 1970s, and with the increase in *Nsta* we observe an overall decrease in secondary gap.

The final aspect of the station data we discuss here regards the period at which the amplitudes of the surface waves are measured. We do that by showing, similarly to Bormann et al. (2009, 2012), the distance-period distributions of  $(\frac{A}{T})_{max}$  for earthquakes prior to and since 1964 (Fig. 7 and Fig. 8, respectively). The separation in these two time periods is linked both to the start of the original ISC Bulletin (Adams et al., 1982) in 1964 and a change in observatory practice by many institutions due to the WWSSN introduction in the early 1960s. The standard WWSSN practice produces amplitudes of surface waves as

measured for  $T$  around 20 seconds (usually  $\pm 2$  or  $\pm 3$  seconds) for distances  $\geq 20^\circ$  (in addition, measurements on the vertical component were preferred to horizontal ones since the 1970s). Before WWSSN, however, the standard practice was to measure the surface wave amplitudes in broader period ranges (such differences led IASPEI, 2013, to recommend the computation of two types of  $MS$ ,  $MS_{20}$  and  $MS_{BB}$ ). Therefore, before 1964 we observe in Fig. 7 that  $T$  falls reasonably well within the expected period ranges of Vaněk et al. (1962) (i.e., amplitudes measured over a broad  $T$  range and using data below  $20^\circ$ ), whereas from 1964 onward we see surface amplitudes predominantly measured around  $T$  of 20 seconds throughout the entire distance range, as shown by the vertical component of Fig. 8. The surface wave amplitude-period measurements pre-WWSSN, therefore, allow us to expand the delta-period limits for pre-1964 earthquakes as outlined in Section 2.

However, not all reporters fully adopted WWSSN standards. Indeed, among the largest ones (Fig. 3), agency BJI, MOS and PRU report surface wave amplitudes in broad period ranges. The delta-period plots of those agencies are shown in Appendix A (Figs. A2, A3, A4). Other agencies, instead, strictly adhere to amplitude-period measurements around 20 seconds (Figs. A5, A6, A7, for agencies IDC, LDG and NEIC from 2009, respectively).

As a final remark in this section, we reiterate, as already done in Di Giacomo et al. (2015a), that the differences in distance and period ranges do not introduce a discontinuity in the  $MS$  estimates before-after 1964. The expansion of the delta-period limits pre-1964 is allowed by the data and it often gives us the opportunity to increase  $N_{sta}$  for our network  $MS$  computation in a time period where surface wave data was scant (compared to current times) and not digitally available (hence the need of not discarding precious and hard to get data). As a result of our approach, about 40% of the pre-1964 earthquakes we list in the ISC  $MS$  dataset gained from 1 to 28 station magnitudes, and 1,000 of those earthquakes would not have network  $MS$  without delta-period augmentation. This is synthesized in Fig. 9. An area encompassing the North Atlantic mid-oceanic ridges, the Euro-Mediterranean and the Middle-East benefitted the most thanks to European and central Asian stations that measured surface waves in broad period ranges at distances below  $20^\circ$ .

#### 4 Catalogue properties

The ISC  $MS$  dataset has a minimum cut-off magnitude of 4.5. Earthquakes with lower  $MS$  values are available in the ISC Bulletin but mostly in recent decades. The major improvements regard earthquakes prior to 1964, where, according to our records, out of 10,057 earthquakes the ISC is the first to compute  $MS$  for 4,940 of them (their distribution and timeline is shown in Fig. A8).

Considering the whole ISC  $MS$  dataset, major features can be discussed using Fig. 10, where we show the magnitude time-line, number of earthquakes per year for various magnitude thresholds and annual magnitude of completeness ( $M_c$ ) computed with the maximum curvature method of Wiemer and Wyss (2000). Overall, we include  $MS < 5.5$  earthquakes mostly from the 1980s, and  $M_c$  approaches approximately 4.5 in the last 20 years. We note that we were able to obtain more solutions at the low magnitude end particularly in the late-1920s-1930s. This has been possible thanks to the establishment of the backbone network in former Soviet Union territory and a general increase of  $MS$  stations in other areas (see annual station maps in International Seismological Centre, 2021d). An overall dip is observed in the 1940s, most likely caused by the disruption of

World War II on the seismic network (Di Giacomo et al., 2018). The period 1960-1977 also features less earthquakes below 5.5 than previous and following decades. This is due both to the limited number of stations available and the fact that we digitized surface wave data from the 1960s printed station bulletins only for earthquakes selected in the first version of the ISC-GEM Catalogue (magnitude 5.5 and above, Storchak et al., 2013). In Section 6 we propose activities that are likely to  
195 mitigate significantly the deficiencies of the ISC  $MS$  dataset in most of the 1960s-1970s. Another fluctuation at low magnitudes is observed in the early-1980s. Indeed both the annual counts and  $M_c$  show a significant variation from 1978-1979 ( $M_c$  close to 5.0) to 1980-1983 (higher  $M_c$  ranging between 5.2-5.5). We believe this is due to the temporary absence of MOS surface wave data in 1980-1983 (see Section 6), which was included into the rebuilt ISC Bulletin (Storchak et al., 2020) from 1984 onward ( $M_c$  dropping again to about 5 and below).

200 Less strong variations are seen for moderate size earthquakes (i.e.,  $MS$  between 5.0 and 6.0). The early part of last century (up to the mid-1920s) is clearly complete above magnitude 6.0, whereas since the 1950s the frequency of  $MS$  5.5 and 6.0 appears rather stable. Pronounced variations are observed from the mid-1920 to the 1940s for reasons mentioned above.

Variations over time of the frequency of large (i.e.,  $MS \geq 6.0$ ) earthquakes based on past catalogues have been the subject of debate in past literature. In particular, Pérez and Scholz (1984) suggested that, under the assumption of constant rate earthquake  
205 occurrence, temporal variations of large shallow earthquakes were driven by instrumental changes. Ogata and Abe (1991) and more recently Ogata (2021), however, suggest that variations in the frequency of global large earthquakes are a real effect of the Earth's seismic activity (long-range dependence nature of earthquake occurrence). Therefore, to further discuss the rate of the Earth's large shallow seismicity, we show in Fig. 11 the cumulative number of strong to major earthquakes in the ISC  $MS$  dataset similarly to the figures in Pérez and Scholz (1984) and Pérez (1999). Compared to these works, our rates for  $MS$   
210  $\geq 7.0$  and 6.0 in different time intervals (Table 2) show some significant differences and lack large jumps from one period to another. This is strikingly evident for the  $MS \geq 6.0$  distribution, where Pérez (1999) rate goes down to  $38y^{-1}$  during 1964-1978 compared to a rate of about  $78y^{-1}$  in the ISC  $MS$  dataset. We note that this period in the original ISC Bulletin lacked the ISC's own computations of  $MS$ . Therefore, Pérez (1999) rates may have been biased by using largely incomplete inputs.

In general, we see that shallow seismicity rates are characterized by a global low occurring between the great earthquakes  
215 of the early 1960s and the beginning of the current century (Ammon et al., 2010). Although rates for  $MS \geq 7.0$  in the first part of the last century are comparable to the rate we have observed since 2005, it seems that rates for  $MS \geq 6.0$  from the WWSSN introduction appear to be lower than rates in the first part of the last century. We also assessed if by declustering (Reasenber, 1985) the  $MS$  catalogue the rates would be different but only small variations occur, and, more importantly, relative differences between time periods remain. This is not surprising as the ISC  $MS$  dataset does not contain a large number of aftershocks for  
220  $MS \geq 6.0$  (by the very nature of  $MS$  it is more difficult to obtain it for aftershocks of large earthquakes due to association challenges in overlapping signals, particularly in routine operations).

It is not the aim of this work to investigate whether fluctuations in seismic activity rates are partially due to instrumental changes or purely due to natural variations of the Earth's seismicity. However, we believe that the ISC  $MS$  dataset is one of the best inputs to date to do such studies. In this context it is important to point out that the quality of instrumental earthquake  
225 catalogues depends on the quality of the data available at the time of processing. In our experience, for long-term datasets it

is almost unavoidable that different types of shortcomings may occur in different time periods, for example due to external factors (e.g., network deficiencies during World Wars) and that faulty individual entries may be present. It is of paramount importance, therefore, that datasets are well-documented and that users know how they are created in order to properly use them for research.

## 230 5 On the $MS$ saturation and large differences with $M_w$

By the time  $MS$  was introduced by Gutenberg (1945) no magnitude 9 or 9+ earthquake had been recorded instrumentally. The occurrence of the 4 November 1952, Kamchatka earthquake and the well-known great earthquakes of the early 1960s (22 May 1960, Chile and 28 March 1964, Alaska earthquakes), drew attention to a shortcoming of  $MS$ , that is commonly referred to as magnitude saturation. This was one of the factors that led Kanamori (1977) and Hanks and Kanamori (1979) to introduce  
235 the moment magnitude  $M_w$ , which is based on a physical parameter of the seismic source (i.e., seismic moment) rather than amplitude-period measurements.

In Fig. 12 we compare the ISC  $MS$  dataset with  $M_w$  from GCMT and the bibliographic search for pre-1976 earthquakes of Lee and Engdahl (2015) and follow-up updates as listed at [www.isc.ac.uk/iscgem/mw\\_bibliography.php](http://www.isc.ac.uk/iscgem/mw_bibliography.php), last access: August 2021 (hereafter referred to as  $M_w$  from literature). Such magnitude comparison has been discussed in several papers, particularly to derive magnitude conversion relationships. For this work, however, we show this comparison to focus on the  $MS$   
240 saturation issue and briefly touch upon earthquakes with large ( $M_w-MS$ ) differences.

The ten largest earthquakes (in  $M_w$  terms) ever recorded are easily identified in Fig. 12 by the event code in the ISC Event Bibliography (Di Giacomo et al., 2014; International Seismological Centre, 2021a). As already summarized by Kanamori (1983), the saturation of  $MS$  is generally expected to start between 8.2 and 8.5. For recent (26 December 2004, Sumatra and  
245 11 March 2011, Tohoku) and pre-GCMT earthquakes (the above mentioned Chile 1960 and Alaska 1964) with  $M_w$  9 and above, the effects of saturation are quite severe and vary between 0.6 and 1 magnitude unit (m.u.). However, for earthquakes with  $M_w$  between 8 and 9 the variation of the saturation appears to vary much more (from near to 0 up to 1 m.u.). For example, the 27 February ~~2018~~2010, Maule,  $M_w$  8.8 earthquake has an  $MS$  of only 0.25 m.u. smaller, close to common  $M_w-MS$  differences observed across a wide magnitude range before the saturation of  $MS$  is expected. Fig. 12 shows other examples  
250 where  $M_w$  and  $MS$  are close to the 1:1 line between 8 and 8.7 (including the 15 August 1950 Assam earthquake). ~~On the other hand, large differences are observed for other earthquakes (e.g., 4 February 1965, Rat Islands and the 28 March 2005, Nias earthquakes). This often occurs~~ With regard to great earthquakes with large  $M_w-MS$  differences, some of those belong to a peculiar category of events, the so-called tsunami earthquakes (Kanamori, 1972). As already well-documented in the literature, these are earthquakes characterized by ~~These have~~ a relatively small  $MS$  compared to their  $M_w$  and are well-documented in the literature. The most striking example is probably the 1 April 1946, Aleutian earthquake, where our  $MS$  of 7.4 is much smaller than the  $M_w$  8.6 by López and Okal (2006). On the other hand, large differences are observed for other earthquakes (e.g., 4 February 1965, Rat Islands and the 28 March 2005, Nias earthquakes) not strictly considered as tsunami earthquakes.

260 Considering In light of the  $MS$  values for the largest earthquakes ever recorded, we support the remarks by Bormann (2011) that it would be more correct to speak of  $MS$  underestimation rather than saturation, as the latter would require to be systematically observable for great earthquakes with  $M_w$  between 8.2-8.5 and above. However, we have shown that underestimation (“saturation”) depends on the type of earthquake, and it is severe only for a handful of the largest earthquakes ever recorded ( $M_w \geq 9$ ). Therefore, the underestimation (“saturation”) of  $MS$  should not discourage researches to use it as a reliable measure of the size of shallow earthquakes. We also suggest that  $MS$  and  $M_w$ , as expressions at different periods of the earthquake size, should be used together to better characterize the source properties of an earthquake.

265 Overall, the magnitude comparison of Fig. 12 shows that  $MS$  is typically close to  $M_w$  over the magnitude range 6.2 to 8, whereas for smaller earthquakes  $MS$  is usually smaller than  $M_w$ . However, some earthquakes show large differences (examples listed in Table A1, for  $MS \gg M_w$  and vice-versa). For the sake of brevity we do not discuss every earthquake with such large differences but touch only on the case of the 18 April 1906, San Francisco earthquake (SANFRANCISCO1906, first event in Table A1) to clarify our reasons for keeping such entries in the ISC  $MS$  dataset.

270 The  $MS$  of the SANFRANCISCO1906 earthquake is dominated by stations located in Germany (GTT, POT, LEI and JEN), plus Apia (API, Samoa Islands) and OSA (Osaka, Japan) at different azimuths. All station  $MS$  are consistently above 8, resulting in a network  $MS$  of  $8.6 \pm 0.1$  (full station details listed under event = 16957905 in International Seismological Centre, 2021d). This is a much higher value than the  $M_w = 7.7$  obtained by Wald et al. (1993). Such outliers occur in most earthquake catalogues for various reasons. As mentioned earlier, parameters of individual earthquakes are the result of the processing of the data available at a given time. For the SANFRANCISCO1906 earthquake, instrumental issues could have played a major role in the high  $MS$  value. However, we believe that listing such results in the dataset (rather than deprecating) is important for legacy reasons, and that users may still use such information for further studies and, ideally, motivate the community to attempt additional data collection. The latter is an activity that we will continue and discuss in the next section.

## 6 Future developments

280 The maintenance and development of the ISC  $MS$  dataset will not cease with this work. First, we intend to routinely add the last calendar year reviewed by the ISC. This means that once the ISC review is over for 2019 earthquakes, the ISC  $MS$  dataset will be updated and end in 2019, and so on in following years. Secondly, we aim at refining and adding  $MS$  solutions for past years. Indeed, we are aware that the  $MS$  station contribution can be improved in certain years. One example was already pointed out for 1980-1983, where MOS surface wave data was not included in time for ISC rebuild project (Storchak et al., 2020). By adding such data we expect to fill (or, at least, partially fill) the gap shown in those years for low  $MS$  earthquakes, as shown in Fig. 10.

Before the early 1980s, the following time periods may benefit from additional station contributions:

- During the 1970s, one source that, to our knowledge, has never been digitized, is the printed bulletins of the Chinese network. Tens of stations with plenty of surface wave data are available in those bulletins, which can potentially increase  $N_{sta}$  for earthquakes already listed in the dataset and allow us to compute  $MS$  for several new ones;

- Due to time and funding limitations, the digitization of 1964-1970 surface wave data from printed station/network bulletins (Di Giacomo et al., 2015b) was not done for all bulletins available at the ISC, and, if done, it focused on earthquakes with magnitude 5.5 and above. Hence, a more comprehensive approach for surface wave data digitization is desirable for these years;
- 295 • For the period 1936-1963 we are finalizing the digitization of station arrival times for earthquakes in the bulletins of the Bureau Central International de Séismologie (BCIS, 1933-1968) that were not listed in the International Seismological Summary (ISS, 1918-1963) (earthquakes in this time period that are not listed in the ISS currently have no station data digitally available in the ISC database). Once this undertaking is finished, we will add surface wave data for earthquakes recorded teleseismically and attempt to obtain *MS* for as many earthquakes as possible;
- 300 • Improvements in the first part of the last century are more challenging as we have nearly exhausted the digitization of printed bulletins available to us. It is hard to verify if our surface wave data collection from printed bulletins is as complete as possible. Assistance in this respect from observatories and archives around the world would be highly appreciated (the presence or absence of a set of station data can be easily checked in the ISC *MS* dataset).

Hence, if conditions permit, we wish to continue the digitization of printed bulletins and add surface wave data in order to  
305 improve the *MS* solutions for a significant fraction of pre-1980 earthquakes. However, we stress that additional contributions for earthquakes in recent decades are welcome as well and we will strive to include them in the ISC Bulletin, and in turn, in the ISC *MS* dataset.

## 7 Conclusions

An aspect that differentiates *MS* from other magnitude scales is that it can be computed from original measurements of surface  
310 wave amplitudes and periods throughout the instrumental period. The ISC *MS* dataset we presented here includes 100+ years of earthquakes with  $MS \geq 4.5$  starting from the dawn of modern instrumental seismology (1904) up to the last complete reviewed year by the ISC (2018). This achievement is possible as a result of a monumental undertaking thanks to which pre-1971 measurements of surface waves were digitized from a multitude of printed station/network bulletins.

We have summarized the evolution of the station network contributing to *MS* and highlighted its shortcomings (e.g., sig-  
315 nificant lack of stations in the Southern hemisphere for a large part of the last century) and strengths (e.g., high density in Europe that allowed us to obtain *MS* for earthquakes in a wide area in low magnitude ranges before the introduction of modern digital stations). The expansion of the delta-period ranges, as allowed by the data, resulted in more and better constrained *MS* estimations for about 40% of the pre-1964 earthquakes.

We have discussed the *MS* underestimation for the largest earthquakes ever recorded and pointed out the presence of occa-  
320 sional large differences with *M<sub>w</sub>*. Those entries are listed for legacy and other purposes and may require further work.

Inevitably, the dataset has fluctuations in terms of completeness and earthquake rates over different time periods. We discussed the most relevant ones and outlined plans for continuing and improving this dataset.

In the years to come we envisage the ISC *MS* dataset as one of the best input researchers can use for various seismological studies, including the Earth's seismicity patterns.

## 325 **8 Data availability**

The ISC *MS* dataset (International Seismological Centre, 2021d) is available in the ISC Dataset Repository at <http://doi.org/10.31905/0N4HOS2D>. [The dataset is released without licence.](#) It is composed of a catalogue file (CSV format) and annual files containing the underlying station data used to obtain *MS* for each earthquake. All parameters in the catalogue and annual files are detailed in the README file in International Seismological Centre (2021d). The annual files include, below the  
330 earthquake parameters, two data blocks: first the station magnitude block (sorted by distance) and then the phase data block, which includes the original amplitude and period measurements as well as the intermediate magnitude results (amplitude and reading magnitude,  $MS_Z$ ,  $MS_H$ ) that lead to the station magnitude computation (see Section 2). Annual station plots and annual station lists are also included as well as the file with the data points to generate Fig. 12.

*Author contributions.* DDG is the lead author, prepared the dataset and figures, supervised the digitization of the surface wave data and vetted  
335 the *MS* results up to 1963. DAS obtained the funding for the work and established and maintained operational connections with many data providers, especially in obtaining additional datasets previously unavailable. Both authors contributed to the manuscript and approved the final version.

*Competing interests.* The authors declare that they have no conflict of interest.

*Acknowledgements.* We are grateful to all reporters that contribute or have contributed data to the ISC, particularly in terms of *MS* for  
340 this work. [We thank Kenji Satake, Emmanuel Scordilis, Nobuo Hamada and an anonymous reviewer for their comments and suggestions that helped us to improve the manuscript.](#) Special thanks go to many colleagues that lent or donated to the ISC station/network printed bulletins originally not available to us, as summarized at [www.isc.ac.uk/printedStnBulletins/](http://www.isc.ac.uk/printedStnBulletins/), last access: [August-~~November~~ 2021](#). Daniela Olaru and former data entry staff were instrumental to this work for digitizing the surface wave data from printed bulletins. The ISC is able to continue its mission thanks to the support of its members (<http://www.isc.ac.uk/members/>, last access: [August-~~November~~ 2021](#)) and  
345 sponsors (<http://www.isc.ac.uk/sponsors/>, last access: [August-~~November~~ 2021](#)). Work partially funded by NSF grants 1811737, 1417970 and 0949072; USGS Awards G14AC00149, G15AC00202, G18AP00035 and G19AS00033. All figures were drawn using the Generic Mapping Tools (Wessel et al., 2013).



## References

- Abe, K.: Magnitudes of large shallow earthquakes from 1904 to 1980, *Physics of the Earth and Planetary Interiors*, 27, 72–92, 350 [https://doi.org/10.1016/0031-9201\(81\)90088-1](https://doi.org/10.1016/0031-9201(81)90088-1), 1981.
- Abe, K.: Complements to “Magnitudes of large shallow earthquakes from 1904 to 1980”, *Physics of the Earth and Planetary Interiors*, 34, 17–23, [https://doi.org/10.1016/0031-9201\(84\)90081-5](https://doi.org/10.1016/0031-9201(84)90081-5), 1984.
- Abe, K. and Noguchi, S.: Determination of magnitude for large shallow earthquakes 1898–1917, *Physics of the Earth and Planetary Interiors*, 32, 45–59, [https://doi.org/10.1016/0031-9201\(83\)90077-8](https://doi.org/10.1016/0031-9201(83)90077-8), 1983a.
- 355 Abe, K. and Noguchi, S.: Revision of magnitudes of large shallow earthquakes, 1897–1912, *Physics of the Earth and Planetary Interiors*, 33, 1–11, [https://doi.org/10.1016/0031-9201\(83\)90002-x](https://doi.org/10.1016/0031-9201(83)90002-x), 1983b.
- Adams, R. D., Hughes, A. A., and McGregor, D. M.: Analysis procedures at the International Seismological Centre, *Physics of the Earth and Planetary Interiors*, 30, 85–93, [https://doi.org/10.1016/0031-9201\(82\)90093-0](https://doi.org/10.1016/0031-9201(82)90093-0), 1982.
- Allen, T. I., Marano, K. D., Earle, P. S., and Wald, D. J.: PAGER-CAT: A Composite Earthquake Catalog for Calibrating Global Fatality 360 Models, *Seismological Research Letters*, 80, 57–62, <https://doi.org/10.1785/gssrl.80.1.57>, 2009.
- Ammon, C. J., Lay, T., and Simpson, D. W.: Great Earthquakes and Global Seismic Networks, *Seismological Research Letters*, 81, 965–971, <https://doi.org/10.1785/gssrl.81.6.965>, 2010.
- BCIS: Bureau Central International de Séismologie, monthly issues, 1933-1968.
- Bondár, I. and Storchak, D. A.: Improved location procedures at the International Seismological Centre, *Geophysical Journal International*, 365 186, 1220–1244, <https://doi.org/10.1111/j.1365-246x.2011.05107.x>, 2011.
- Bondár, I., Myers, S. C., Engdahl, E. R., and Bergman, E. A.: Epicentre accuracy based on seismic network criteria, *Geophysical Journal International*, 156, 483–496, <https://doi.org/10.1111/j.1365-246x.2004.02070.x>, 2004.
- Bondár, I., Engdahl, E. R., Villaseñor, A., Harris, J., and Storchak, D.: ISC-GEM: Global Instrumental Earthquake Catalogue (1900–2009), II. Location and seismicity patterns, *Physics of the Earth and Planetary Interiors*, 239, 2–13, <https://doi.org/10.1016/j.pepi.2014.06.002>, 370 2015.
- Bormann, P.: Earthquake, Magnitude, in: *Encyclopedia of Solid Earth Geophysics*, edited by Gupta, H. K., pp. 207–218, Springer, Dordrecht, [https://doi.org/10.1007/978-90-481-8702-7\\_3](https://doi.org/10.1007/978-90-481-8702-7_3), 2011.
- Bormann, P.: Magnitude calibration formulas and tables, comments on their use and complementary data, In: Bormann, P. (Ed.), *New Manual of Seismological Observatory Practice 2 (NMSOP-2)*, Potsdam: Deutsches GeoForschungsZentrum GFZ, 1-19, 375 [https://doi.org/10.2312/GFZ.NMSOP-2\\_DS\\_3.1](https://doi.org/10.2312/GFZ.NMSOP-2_DS_3.1), 2012.
- Bormann, P., Liu, R., Xu, Z., Ren, K., Zhang, L., and Wendt, S.: First Application of the New IASPEI Teleseismic Magnitude Standards to Data of the China National Seismographic Network, *Bulletin of the Seismological Society of America*, 99, 1868–1891, <https://doi.org/10.1785/0120080010>, 2009.
- Bormann, P., Wendt, S., and Di Giacomo, D.: Seismic Sources and Source Parameters, In: Bormann, P. (Ed.), *New Manual of Seismological Observatory Practice 2 (NMSOP-2)*, Potsdam: Deutsches GeoForschungsZentrum GFZ, 1-259, [https://doi.org/10.2312/GFZ.NMSOP-2\\_CH3](https://doi.org/10.2312/GFZ.NMSOP-2_CH3), 2012.
- Coenraads, R. R.: The San Calixto Observatory in La Paz, Bolivia, eighty years of operation, Director Dr. L. Drake, S.J., *Jour. and Proceed. Roy. Soc. of New South Wales*, 126, 191–198, 1993.

- Di Giacomo, D. and Storchak, D. A.: A scheme to set preferred magnitudes in the ISC Bulletin, *Journal of Seismology*, 20, 555–567, <https://doi.org/10.1007/s10950-015-9543-7>, 2016.
- Di Giacomo, D., Storchak, D. A., Safronova, N., Ozgo, P., Harris, J., Verney, R., and Bondár, I.: A New ISC Service: The Bibliography of Seismic Events, *Seismological Research Letters*, 85, 354–360, <https://doi.org/10.1785/0220130143>, 2014.
- Di Giacomo, D., Bondár, I., Storchak, D. A., Engdahl, E. R., Bormann, P., and Harris, J.: ISC-GEM: Global Instrumental Earthquake Catalogue (1900–2009), III. Re-computed MS and mb, proxy MW, final magnitude composition and completeness assessment, *Physics of the Earth and Planetary Interiors*, 239, 33–47, <https://doi.org/10.1016/j.pepi.2014.06.005>, 2015a.
- Di Giacomo, D., Harris, J., Villaseñor, A., Storchak, D. A., Engdahl, E. R., and Lee, W. H. K.: ISC-GEM: Global Instrumental Earthquake Catalogue (1900–2009), I. Data collection from early instrumental seismological bulletins, *Physics of the Earth and Planetary Interiors*, 239, 14–24, <https://doi.org/10.1016/j.pepi.2014.06.003>, 2015b.
- Di Giacomo, D., Engdahl, E. R., and Storchak, D. A.: The ISC-GEM Earthquake Catalogue (1904–2014): status after the Extension Project, *Earth System Science Data*, 10, 1877–1899, <https://doi.org/10.5194/essd-10-1877-2018>, 2018.
- Drake, L. A.: Riverview Observatory, in *St. Ignatius' Centennial 1880-1980* (C. Fracer and E. Lea Scarlett, eds.), St. Ignatius College, Lane-Cove NSW, 1993.
- Dziewonski, A. M., Chou, T.-A., and Woodhouse, J. H.: Determination of earthquake source parameters from waveform data for studies of global and regional seismicity, *Journal of Geophysical Research: Solid Earth*, 86, 2825–2852, <https://doi.org/10.1029/jb086ib04p02825>, 1981.
- Ekström, G., Nettles, M., and Dziewoński, A. M.: The global CMT project 2004–2010: Centroid-moment tensors for 13,017 earthquakes, *Physics of the Earth and Planetary Interiors*, 200–201, 1–9, <https://doi.org/10.1016/j.pepi.2012.04.002>, 2012.
- Engdahl, E. R. and Villaseñor, A.: Global seismicity: 1900–1999, in: *International Handbook of Earthquake and Engineering Seismology*, edited by Lee, W. H. K., Kanamori, H., Jennings, J. C., and Kisslinger, C., vol. A, chap. 41, pp. 665–690, Academic Press, San Diego, 2002.
- Gutenberg, B.: Amplitudes of surface waves and magnitudes of shallow earthquakes, *Bulletin of the Seismological Society of America*, 35, 3–12, 1945.
- Gutenberg, B. and Richter, C.: *Seismicity of the Earth and Associated Phenomena*, Princeton Univ. Press, Princeton, N.J., pp. 310, 1954.
- Hanks, T. C. and Kanamori, H.: A moment magnitude scale, *Journal of Geophysical Research*, 84, 2348–2350, <https://doi.org/10.1029/jb084ib05p02348>, 1979.
- Herak, M. and Herak, D.: Distance dependence of Ms and calibrating function for 20 second Rayleigh waves, *Bulletin of the Seismological Society of America*, 83, 1881–1892, 1993.
- IASPEI: Summary of Magnitude Working Group recommendations on standard procedures for determining earthquake magnitudes from digital data, [ftp://ftp.iaspei.org/pub/commissions/CSOI/Summary\\_WG\\_recommendations\\_20130327.pdf](ftp://ftp.iaspei.org/pub/commissions/CSOI/Summary_WG_recommendations_20130327.pdf), 2013.
- International Seismological Centre: On-line Event Bibliography, <https://doi.org/10.31905/EJ3B5LV6>, 2021a.
- International Seismological Centre: International Seismograph Station Registry (IR), <https://doi.org/10.31905/EL3FQQ40>, 2021b.
- International Seismological Centre: On-line Bulletin, <https://doi.org/10.31905/D808B830>, 2021c.
- International Seismological Centre: The ISC MS dataset for shallow earthquakes since 1904, *ISC Seismological Dataset Repository*, <https://doi.org/10.31905/0N4HOS2D>, 2021d.
- ISS: International Seismological Summary, annual volumes, 1918–1963.

- Kanamori, H.: Mechanism of tsunami earthquakes, *Physics of the Earth and Planetary Interiors*, 6, 346–359, [https://doi.org/10.1016/0031-9201\(72\)90058-1](https://doi.org/10.1016/0031-9201(72)90058-1), 1972.
- Kanamori, H.: The energy release in great earthquakes, *Journal of Geophysical Research*, 82, 2981–2987, <https://doi.org/10.1029/jb082i020p02981>, 1977.
- 425 Kanamori, H.: Magnitude scale and quantification of earthquakes, *Tectonophysics*, 93, 185–199, [https://doi.org/10.1016/0040-1951\(83\)90273-1](https://doi.org/10.1016/0040-1951(83)90273-1), 1983.
- Kárník, V., Kondorskaya, N. V., Riznitchenko, J. V., Savarensky, E. F., Soloviev, S. L., Shebalin, N. V., Vanek, J., and Zátapek, A.: Standardization of the earthquake magnitude scale, *Studia Geophysica et Geodaetica*, 6, 41–48, <https://doi.org/10.1007/BF02590040>, 1962.
- Lee, W. H. K. and Engdahl, E. R.: Bibliographical search for reliable seismic moments of large earthquakes during 1900–1979 to compute  
430 MW in the ISC–GEM Global Instrumental Reference Earthquake Catalogue, *Physics of the Earth and Planetary Interiors*, 239, 25–32, <https://doi.org/10.1016/j.pepi.2014.06.004>, 2015.
- López, A. M. and Okal, E. A.: A seismological reassessment of the source of the 1946 Aleutian ‘tsunami’ earthquake, *Geophysical Journal International*, 165, 835–849, <https://doi.org/10.1111/j.1365-246x.2006.02899.x>, 2006.
- Ogata, Y.: Visualizing heterogeneities of earthquake hypocenter catalogs: modeling, analysis, and compensation, *Progress in Earth and  
435 Planetary Science*, 8, <https://doi.org/10.1186/s40645-020-00401-8>, 2021.
- Ogata, Y. and Abe, K.: Some Statistical Features of the Long-Term Variation of the Global and Regional Seismic Activity, *International Statistical Review / Revue Internationale de Statistique*, 59, 139–161, <https://doi.org/10.2307/1403440>, 1991.
- Oliver, J. and Murphy, L.: WWNSS: Seismology's Global Network of Observing Stations, *Science*, 174, 254–261, <https://doi.org/10.1126/science.174.4006.254>, 1971.
- 440 Pacheco, J. F. and Sykes, L. R.: Seismic moment catalog of large shallow earthquakes, 1900 to 1989, *Bulletin of the Seismological Society of America*, 82, 1306–1349, 1992.
- Peterson, J. R. and Hutt, C. R.: World-Wide Standardized Seismograph Network: a data users guide, U.S. Geological Survey Open-File Report 2014–1218, 74 p., <https://doi.org/10.3133/ofr20141218>, 2014.
- Pérez, O. J.: Revised world seismicity catalog (1950–1997) for strong ( $M_s \geq 6$ ) shallow ( $h \leq 70$  km) earthquakes, *Bulletin of the Seismo-  
445 logical Society of America*, 89, 335–341, 1999.
- Pérez, O. J. and Scholz, C. H.: Heterogeneities of the instrumental seismicity catalog (1904–1980) for strong shallow earthquakes, *Bulletin of the Seismological Society of America*, 74, 669–686, 1984.
- Reasenber, P.: Second-order moment of central California seismicity, 1969–1982, *Journal of Geophysical Research: Solid Earth*, 90, 5479–5495, <https://doi.org/10.1029/jb090ib07p05479>, 1985.
- 450 Rezapour, M. and Pearce, R. G.: Bias in surface-wave magnitude  $M_s$  due to inadequate distance corrections, *Bulletin of the Seismological Society of America*, 88, 43–61, 1998.
- Richter, C. F.: An instrumental earthquake magnitude scale, *Bulletin of the Seismological Society of America*, 25, 1–32, 1935.
- Schering, H.: Seismische Registrierungen in Göttingen im Jahre 1904, *Nachrichten von der Königlichen Gesellschaft der Wissenschaften zu Göttingen, Mathematisch-physikalische Klasse*, 181–200, 1905.
- 455 Storchak, D. A., Di Giacomo, D., Bondár, I., Engdahl, E. R., Harris, J., Lee, W. H. K., Villaseñor, A., and Bormann, P.: Public Release of the ISC–GEM Global Instrumental Earthquake Catalogue (1900–2009), *Seismological Research Letters*, 84, 810–815, <https://doi.org/10.1785/0220130034>, 2013.

- Storchak, D. A., Harris, J., Brown, L., Lieser, K., Shumba, B., Verney, R., Di Giacomo, D., and Korger, E. I. M.: Rebuild of the Bulletin of the International Seismological Centre (ISC), part 1: 1964–1979, *Geoscience Letters*, 4, <https://doi.org/10.1186/s40562-017-0098-z>, 2017.
- 460
- Storchak, D. A., Harris, J., Brown, L., Lieser, K., Shumba, B., and Di Giacomo, D.: Rebuild of the Bulletin of the International Seismological Centre (ISC) - part 2: 1980–2010, *Geoscience Letters*, 7:18, <https://doi.org/10.1186/s40562-020-00164-6>, 2020.
- Udias, A. and Stauder, W.: The Jesuit Contribution to Seismology, *Seismological Research Letters*, 67, 10–19, <https://doi.org/10.1785/gssrl.67.3.10>, 1996.
- 465 Vaněk, J., Zapotek, A., Karnik, V., Kondorskaya, N. V., Riznichenko, Y. V., Savarensky, E. F., Solov'yov, S. L., , and Shebalin, N. V.: Standarizaciya shkaly magnitude (in Russian), *Izvestiya Akad. SSSR., Ser. Geofiz.*, 2, 153-158 (with English translation in 1962 by D. G. Frey, published in *Izv. Geophys. Ser.*), 1962.
- von Seggern, D.: The effects of radiation patterns on magnitude estimates, *Bulletin of the Seismological Society of America*, 60, 503–516, 1970.
- 470 Wald, D. J., Kanamori, H., HelMBERGER, D. V., and Heaton, T. H.: Source study of the 1906 San Francisco earthquake, *Bulletin of the Seismological Society of America*, 83, 981–1019, 1993.
- Wessel, P., Smith, W. H. F., Scharroo, R., Luis, J., and Wobbe, F.: Generic Mapping Tools: Improved Version Released, *Eos, Transactions American Geophysical Union*, 94, 409–410, <https://doi.org/10.1002/2013eo450001>, 2013.
- Wiemer, S. and Wyss, M.: Minimum Magnitude of Completeness in Earthquake Catalogs: Examples from Alaska, the Western United States, 475 and Japan, *Bulletin of the Seismological Society of America*, 90, 859–869, <https://doi.org/10.1785/0119990114>, 2000.
- Willmore, P.: *Manual of Seismological Observatory Practice*, World Data Center A for Solid Earth Geophysics, Report SE-20, 165 pp., 1979.

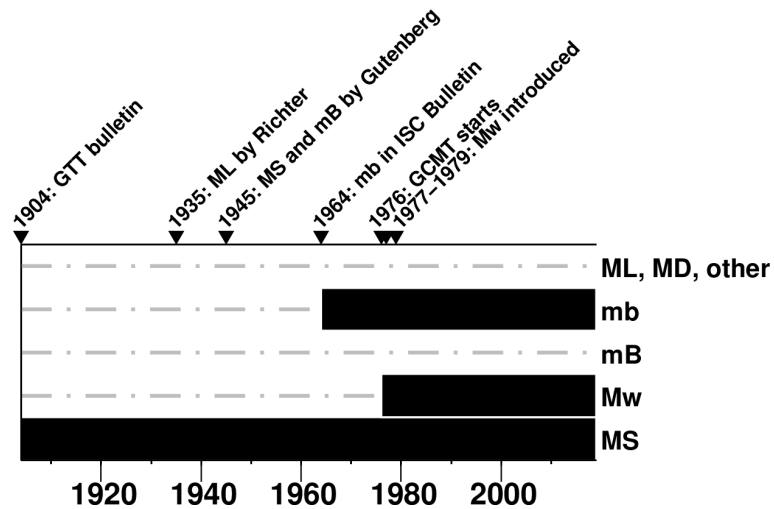

**Figure 1.** Availability over time of common magnitude scales for worldwide ( $MS$ ,  $M_w$ , broad-band and short-period body-wave magnitude  $mB$  and  $mb$ , respectively) and local/regional (e.g., Richter and duration magnitude  $ML$  and  $MD$ , respectively) earthquakes. Solid thick black lines represent time periods over which a magnitude scale is available or can be recomputed systematically, dashed-dotted thin grey lines otherwise. For local/regional magnitudes the availability only regards limited continental areas (Di Giacomo and Storchak, 2016). On top are listed some significant developments in terms of earthquake magnitude. Among those GTT refers one of the first printed station bulletin produced at the Göttingen observatory in Germany (Schering, 1905), which pioneered modern observational seismological practice, and GCMT is the Global Centroid Moment Tensor project ([www.globalcmt.org](http://www.globalcmt.org), last access: August 2021, Dziewonski et al., 1981; Ekström et al., 2012).

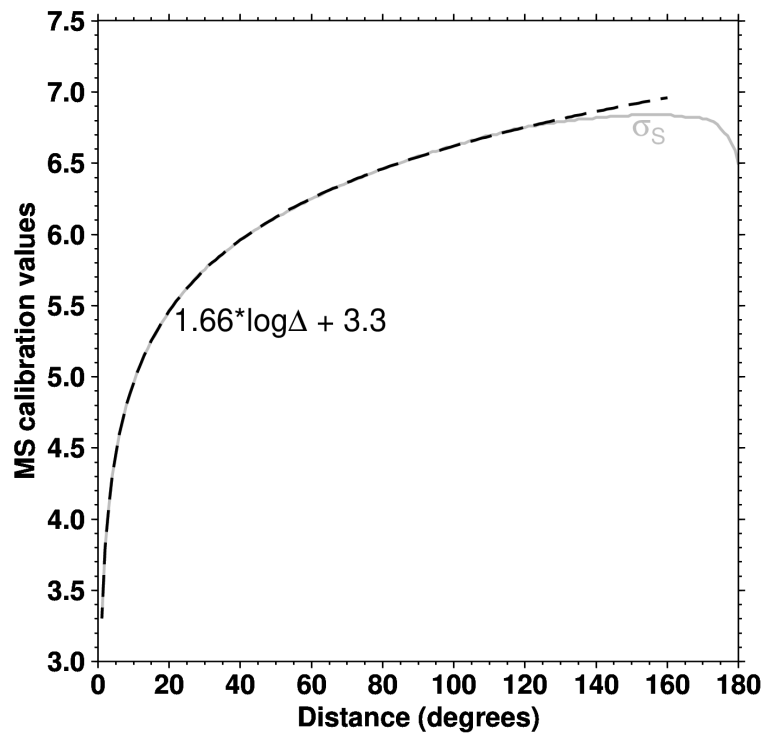

**Figure 2.** MS calibration function (tabulated values,  $\sigma_S$ ) from the Moscow-Prague (grey solid curve) group and its best-fit for distances between  $2^\circ$  and  $160^\circ$  ( $1.66 \log \Delta + 3.3$ , black dashed curve). See Bormann (2012) for details.

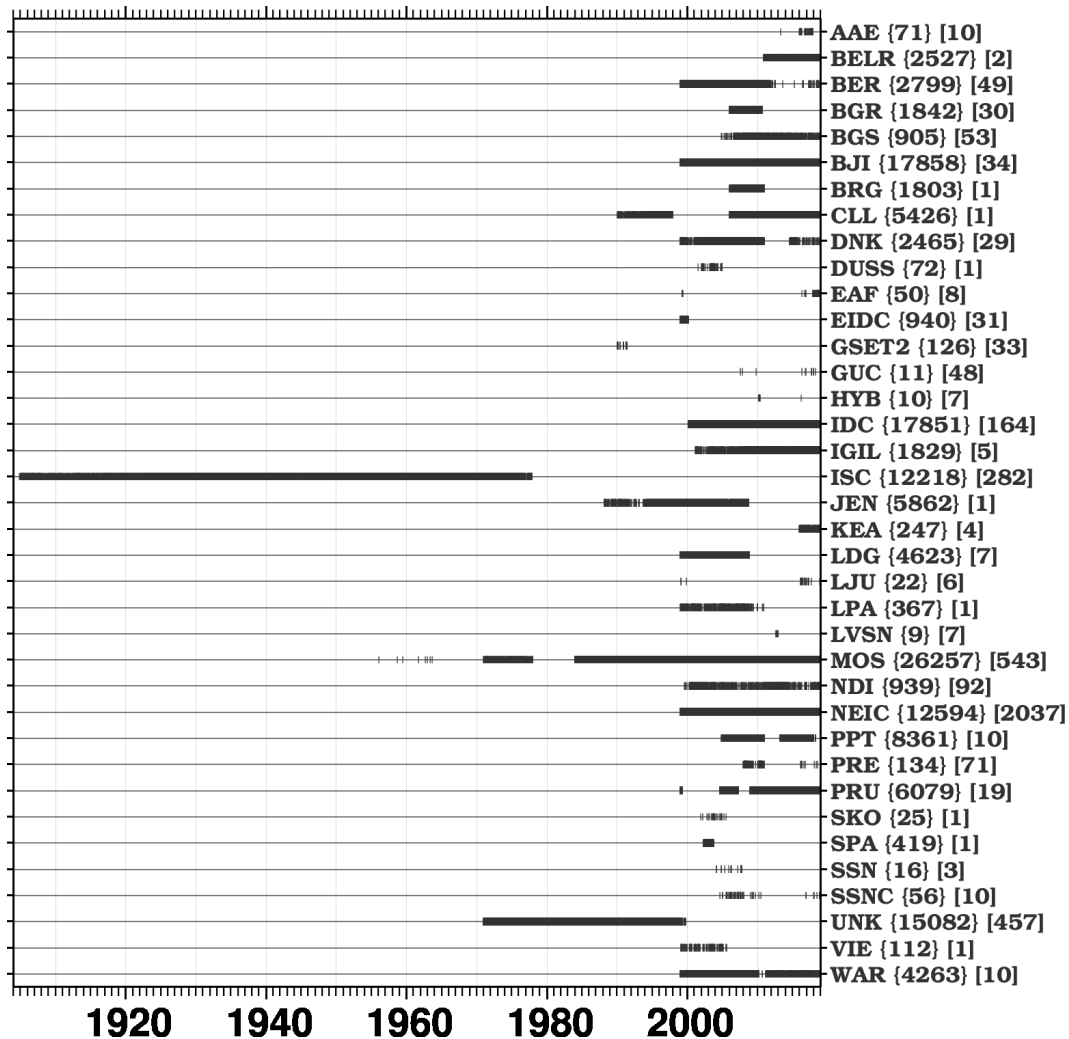

**Figure 3.** Timelines of the agencies contributing with surface wave data (amplitude and period measurements). Each symbol represents the origin time of an earthquake. Details about each agency code can be found by typing the agency code at [www.isc.ac.uk/fiscbulletin/agencies/](http://www.isc.ac.uk/fiscbulletin/agencies/), last access: August 2021. The total number of earthquakes and stations for each agency are listed in curly and square brackets, respectively. Note that reporter = UNK (unknown) is not a genuine reporter code but it simply represents data collected before the ISC database was set up, i.e., when the association between data and reporter was not maintained.

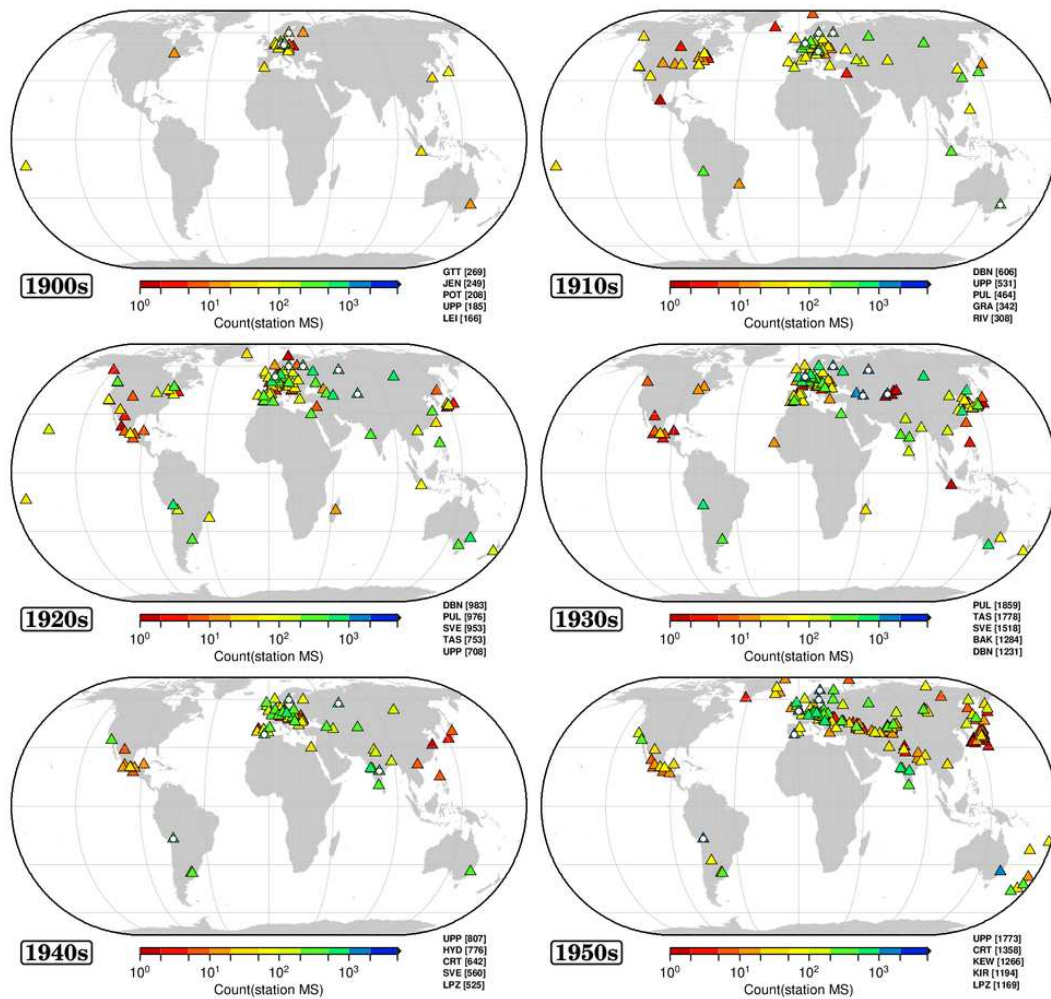

**Figure 4.** Decadal (up to the 1950s) distribution of the stations (triangles) that contributed with surface wave data. Symbols are colour-coded by number of station *MS*. For each decade, the top five stations in terms of *Count(station MS)* are identified by a white circle and listed in the bottom-right corner outside each map. Maps drawn using the Generic Mapping Tools (GMT) (Wessel et al., 2013) software. Plots of the annual station *MS* distributions are included in International Seismological Centre (2021d).



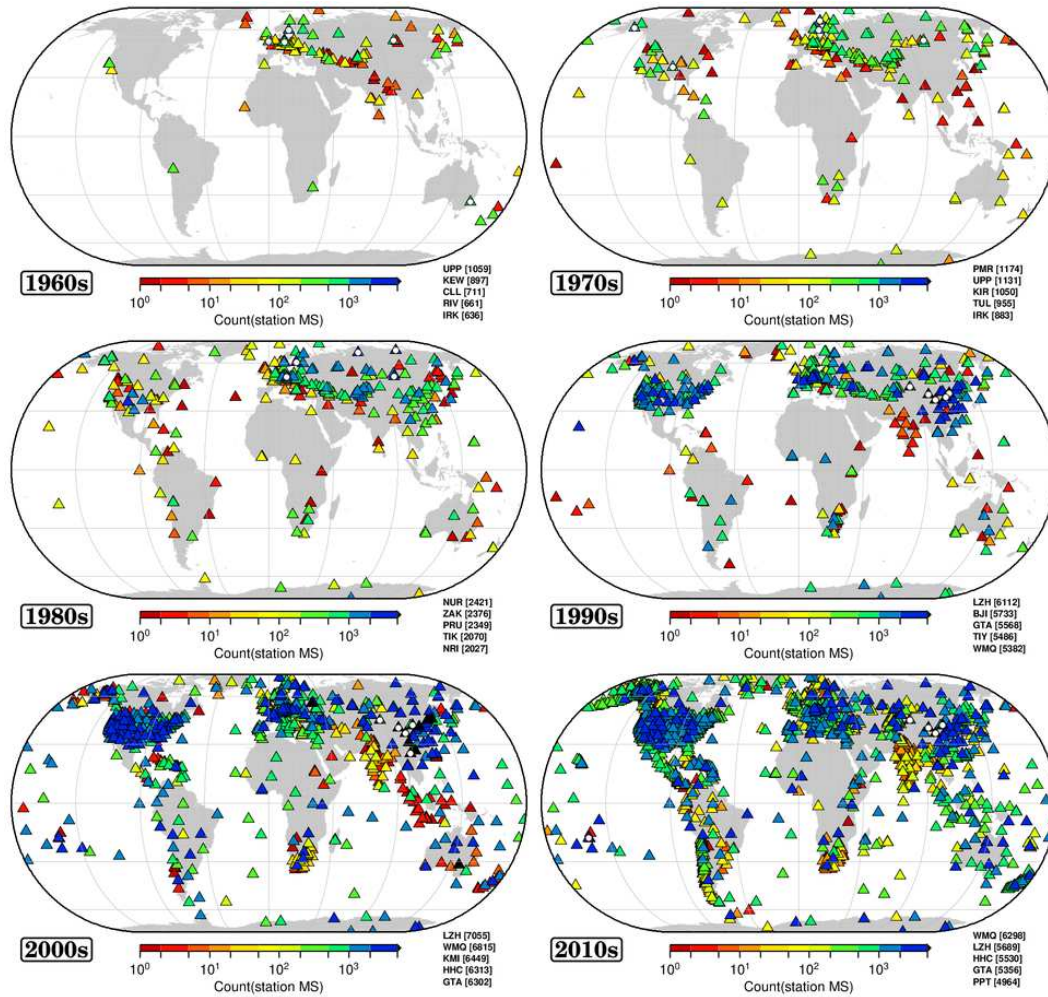

**Figure 5.** As for Fig. 4 but since the 1960s. Maps drawn using the Generic Mapping Tools (GMT) (Wessel et al., 2013) software.

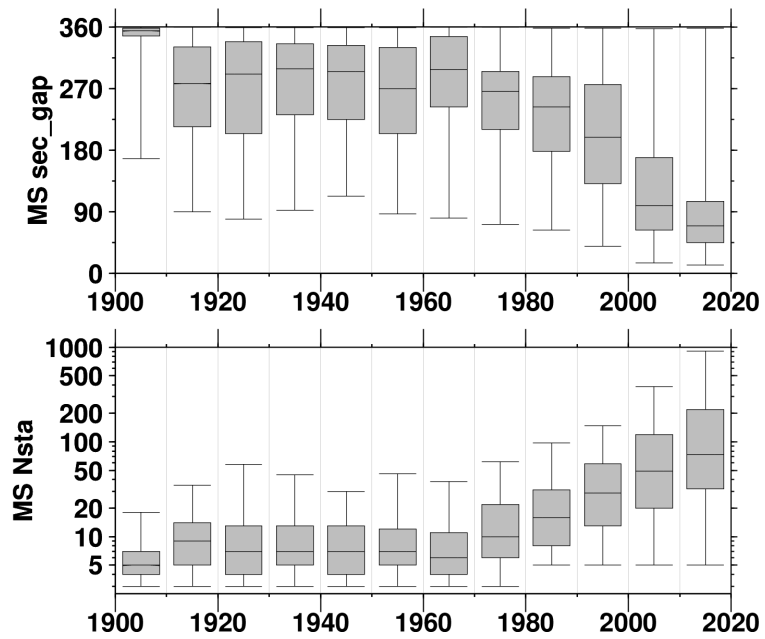

**Figure 6.** Decadal box-and-whisker plot of the secondary gap for *MS* (top) and number of *MS* stations (bottom).

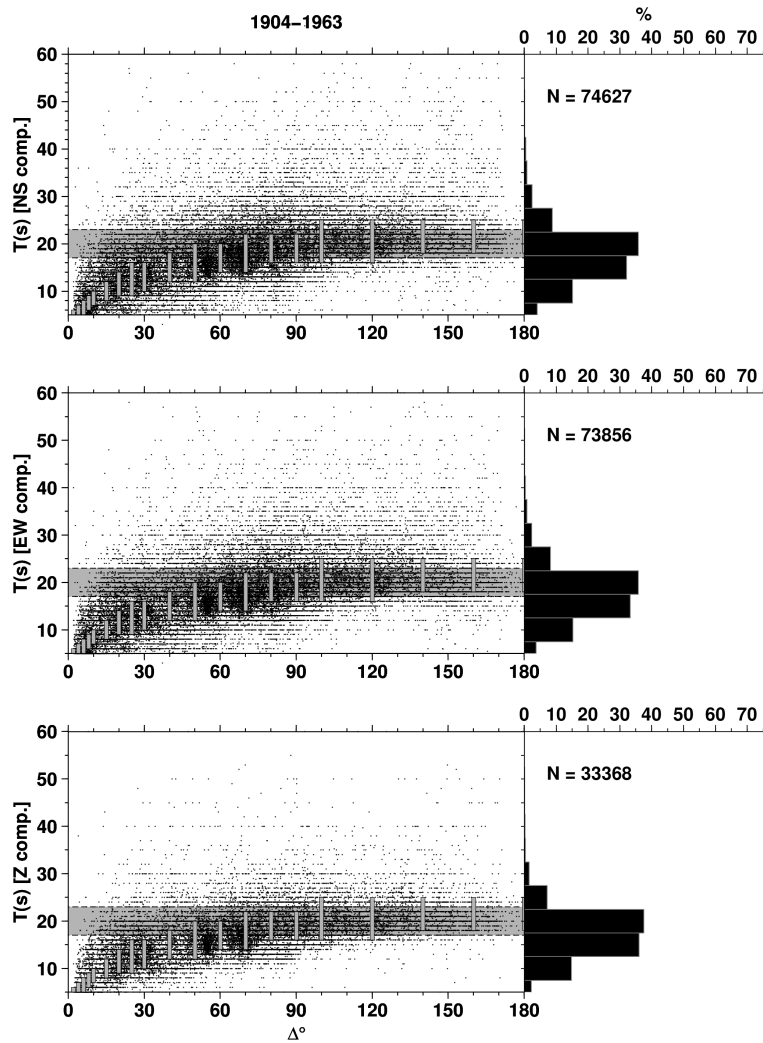

**Figure 7.** 3-component distance-period plots of  $(\frac{A}{T})_{max}$  for surface wave readings digitized from printed bulletins for earthquakes that occurred before 1964. The horizontal grey shaded area depicts measurements around 20 seconds, whereas the vertical grey bars represent the expected period ranges at various distances (Vaněk et al., 1962) as published in Table 3.2.2.1 of Willmore (1979). The histograms on the right-hand side show the period distribution in bins of 5 seconds. See text for details.

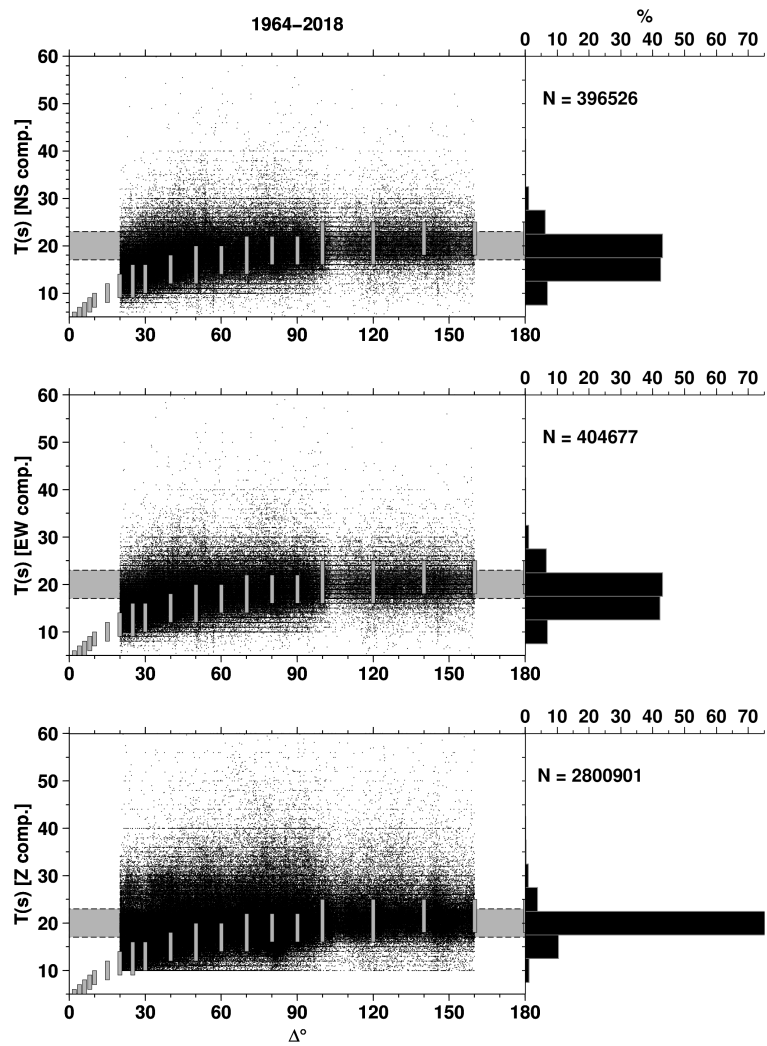

**Figure 8.** As for Fig. 7 but for 1964–2018.

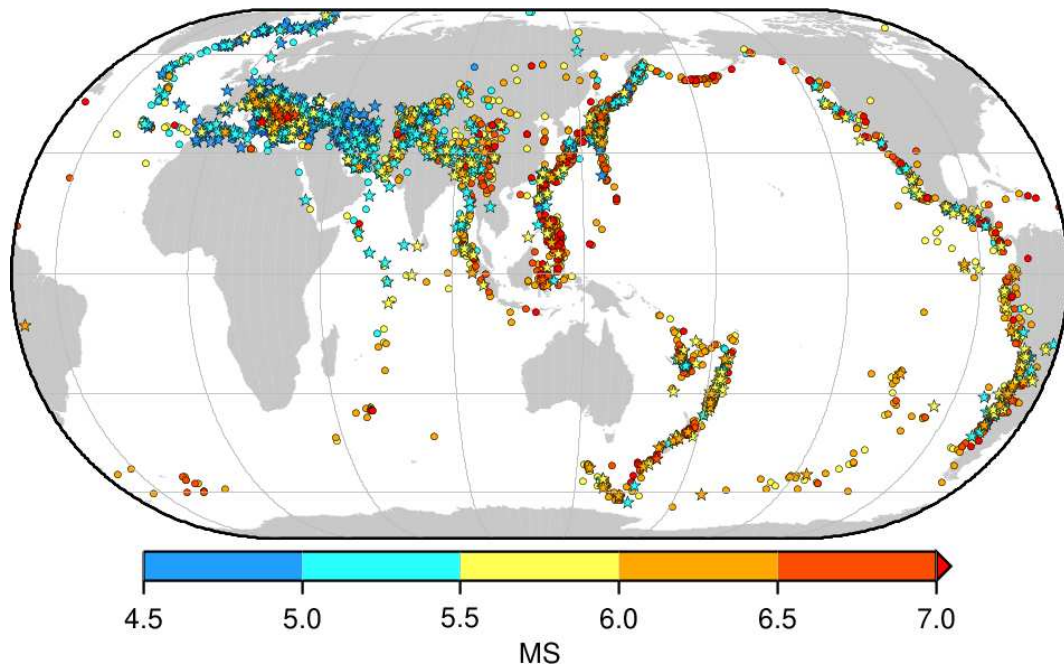

**Figure 9.** Map of the pre-1964 earthquakes where the expansion of the delta-period ranges compared to the current ISC practice allowed us to better constrain  $MS$ . Stars are for the 1,000 earthquakes that otherwise would not have network  $MS$ . All symbols colour-coded by  $MS$ . Map drawn using the Generic Mapping Tools (GMT) (Wessel et al., 2013) software.

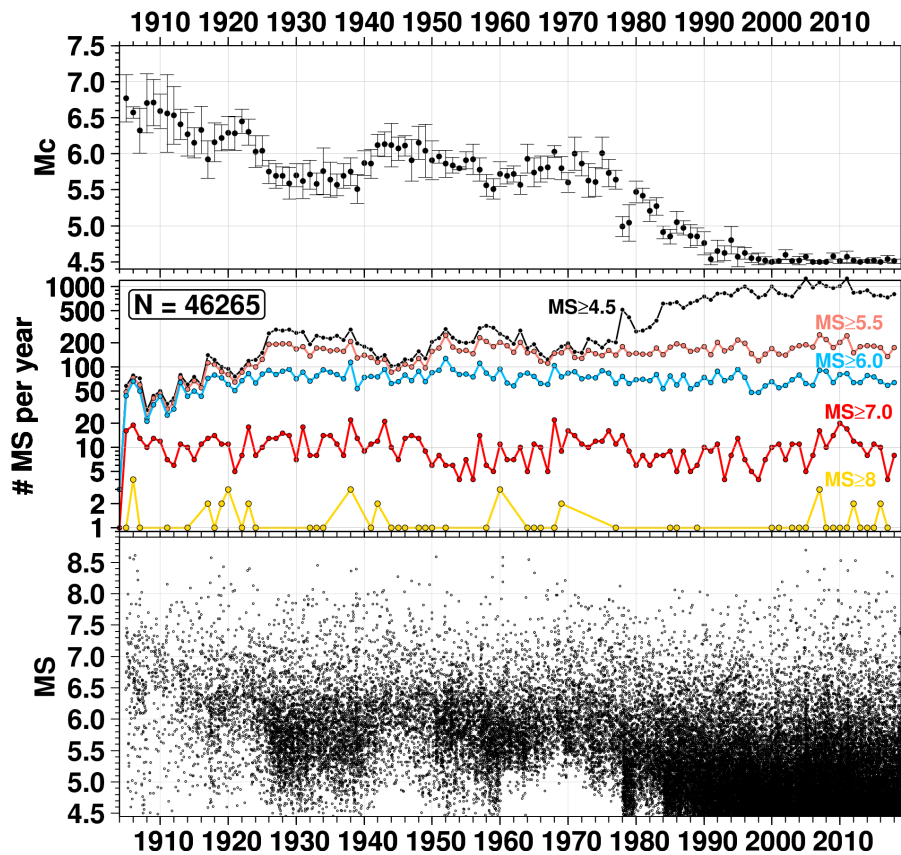

**Figure 10.** Bottom panel: magnitude timeline of the ISC  $MS$  dataset. Middle panel: number of  $MS$  per year for different  $MS$  thresholds (4.5, 5.5, 6.0, 7.0 and 8.0 in black, light red, blue, red and yellow, respectively). Top panel: annual magnitude of completeness  $M_c$  (Wiemer and Wyss, 2000) in the dataset, shown as average  $\pm 1$  standard deviation.

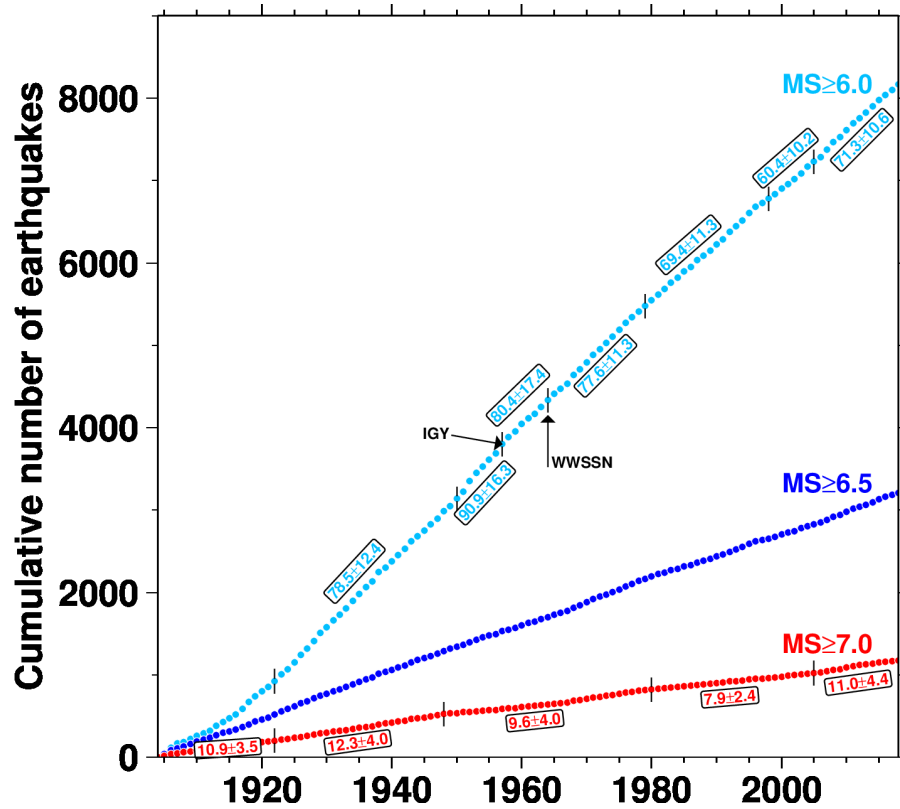

**Figure 11.** Cumulative number of earthquakes with  $MS \geq 7.0$  (red),  $\geq 6.5$  (blue) and  $\geq 6.0$  (cyan). The vertical black segments on the red and cyan symbols locate the time periods considered by Pérez and Scholz (1984) for  $MS \geq 7.0$  (up to 1980) and Pérez (1999)  $MS \geq 6.0$  (from 1950 to 1997), respectively. IGY stands for International Geophysical Year started in 1957. See text for details.

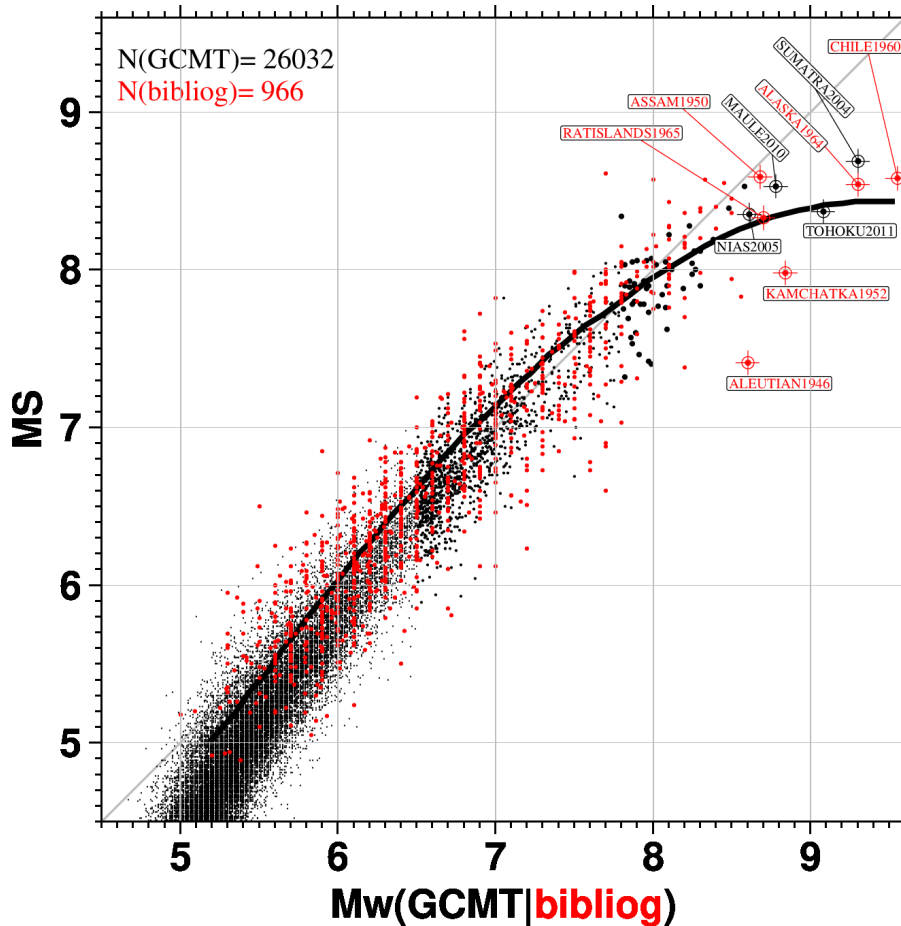

**Figure 12.** Comparison of  $MS$  with  $M_w$  from GCMT (black dots) and from the literature (red, Lee and Engdahl, 2015, and further updates listed at [www.isc.ac.uk/iscgem/mw\\_bibliography.php](http://www.isc.ac.uk/iscgem/mw_bibliography.php), last access: August 2021). The black solid curve is a digitized version of the mid-point  $M_w$ - $MS$  curve shown in Figure 4b of Kanamori (1983). The largest 10 earthquakes in terms of  $M_w$  (bullseye symbols) are also identified by the event code in the ISC Event Bibliography ([www.isc.ac.uk/event\\_bibliography/index.php](http://www.isc.ac.uk/event_bibliography/index.php), last access: August 2021).



**Table 1.** Reading example from station CLL (Collm, Germany) associated to an event in the Northern Mid-Atlantic Ridge occurred the 24 of September 1969 ( $\Delta = 58.8^\circ$ ). The surface wave measurements (L phases) are used by our procedure to obtain the reading *MS*. *Rdid* and *ampid* are database identifiers for the reading and single amplitude-period entries, respectively. See text for details.

| Phase | Comp. | Arrival Time (UTC)  | rdid  | ampid     | A (nm) | T (s) |
|-------|-------|---------------------|-------|-----------|--------|-------|
| S     | N     | 1969-09-24 18:21:14 | 38936 | 601627645 | 16500  | 20.0  |
| S     | E     | 1969-09-24 18:21:14 | 38936 | 601627644 | 25500  | 20.0  |
| L     | N     | 1969-09-24 18:32:00 | 38936 | 601627642 | 23000  | 24.0  |
| L     | E     | 1969-09-24 18:32:00 | 38936 | 601627641 | 44500  | 24.0  |
| L     | Z     | 1969-09-24 18:32:00 | 38936 | 601627640 | 43500  | 24.0  |
| L     | N     | 1969-09-24 18:39:00 | 38936 | 601627639 | 24000  | 17.0  |
| L     | E     | 1969-09-24 18:39:00 | 38936 | 601627638 | 30000  | 17.0  |
| L     | Z     | 1969-09-24 18:39:00 | 38936 | 601627637 | 25000  | 17.0  |
| L     | Z     | 1969-09-24 18:43:00 | 38936 | 601627636 | 32000  | 16.0  |

**Table 2.** Rates of seismicity in the ISC *MS* dataset and in Pérez and Scholz (1984); Pérez (1999). See text for details.

| $MS \geq 7.0$ | Period    | Rate (ISC <i>MS</i> ) | Rate (Pérez and Scholz, 1984) |
|---------------|-----------|-----------------------|-------------------------------|
|               | 1905-1922 | $10.9 \pm 3.5$        | $7.3 \pm 1.8$                 |
|               | 1922-1948 | $12.3 \pm 4.0$        | $12.6 \pm 4.0$                |
|               | 1948-1980 | $9.6 \pm 4.0$         | $7.1 \pm 2.8$                 |
| $MS \geq 6.0$ | Period    | Rate (ISC <i>MS</i> ) | Rate (Pérez, 1999)            |
|               | 1950-1956 | $90.9 \pm 16.3$       | $109 \pm 17$                  |
|               | 1957-1963 | $80.4 \pm 17.4$       | $137 \pm 14$                  |
|               | 1964-1978 | $77.6 \pm 11.3$       | $38 \pm 6$                    |
|               | 1979-1997 | $69.4 \pm 11.3$       | $55 \pm 7$                    |

## **Appendix A: Additional plots**

Here we show figures in support of the main text. Most of them regard additional delta-period plots similar to Fig. 7 for major *MS* reporters.

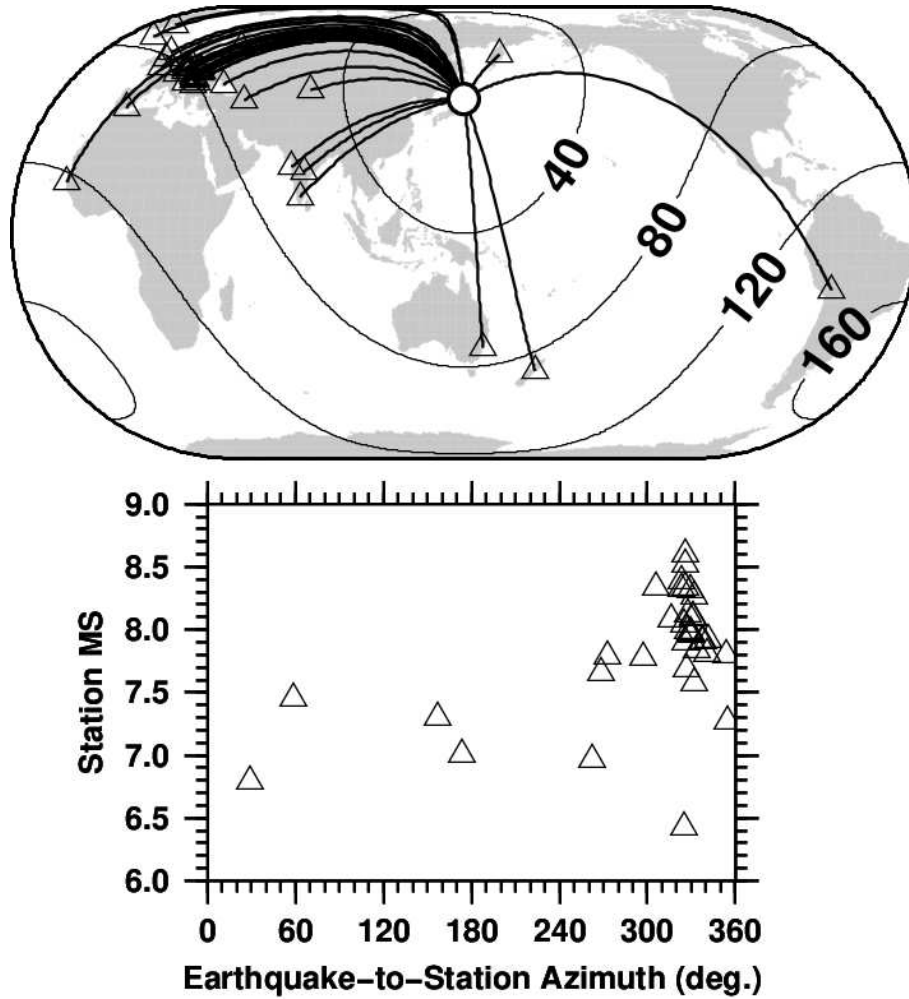

**Figure A1.** [Top: map showing the location of the 1960-03-20 off east coast of Honshu earthquake \(event id = 878564, white circle\) and the stations \(triangles\) contributing to the network  \$MS = 7.9\$ . Contours every 40 degrees distance shown for guidance. Map drawn using the Generic Mapping Tools \(GMT\) \(Wessel et al., 2013\) software; Bottom: azimuthal distribution of the single station  \$MS\$  for this event.](#)

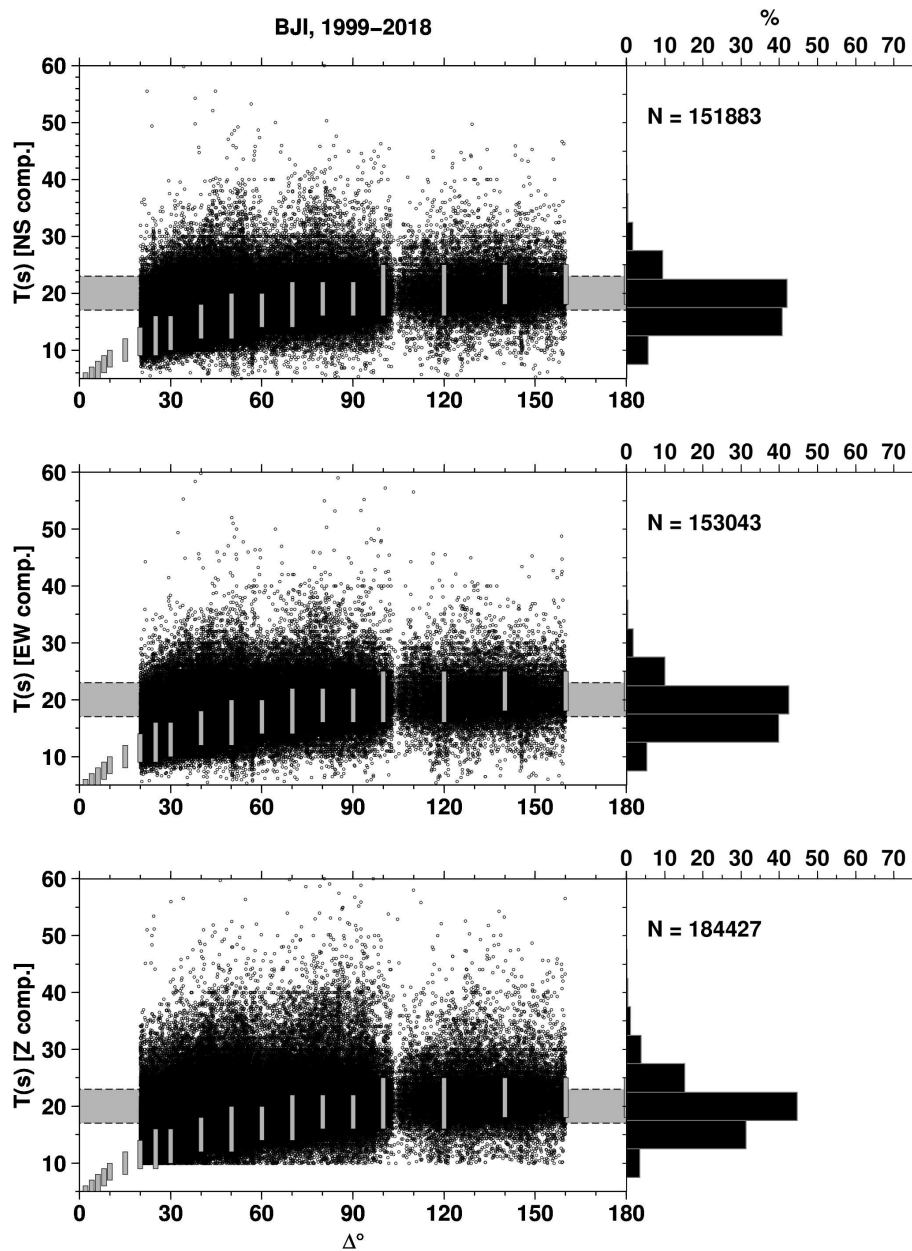

**Figure A2.** As for Fig. 7 but for reporter BJI.

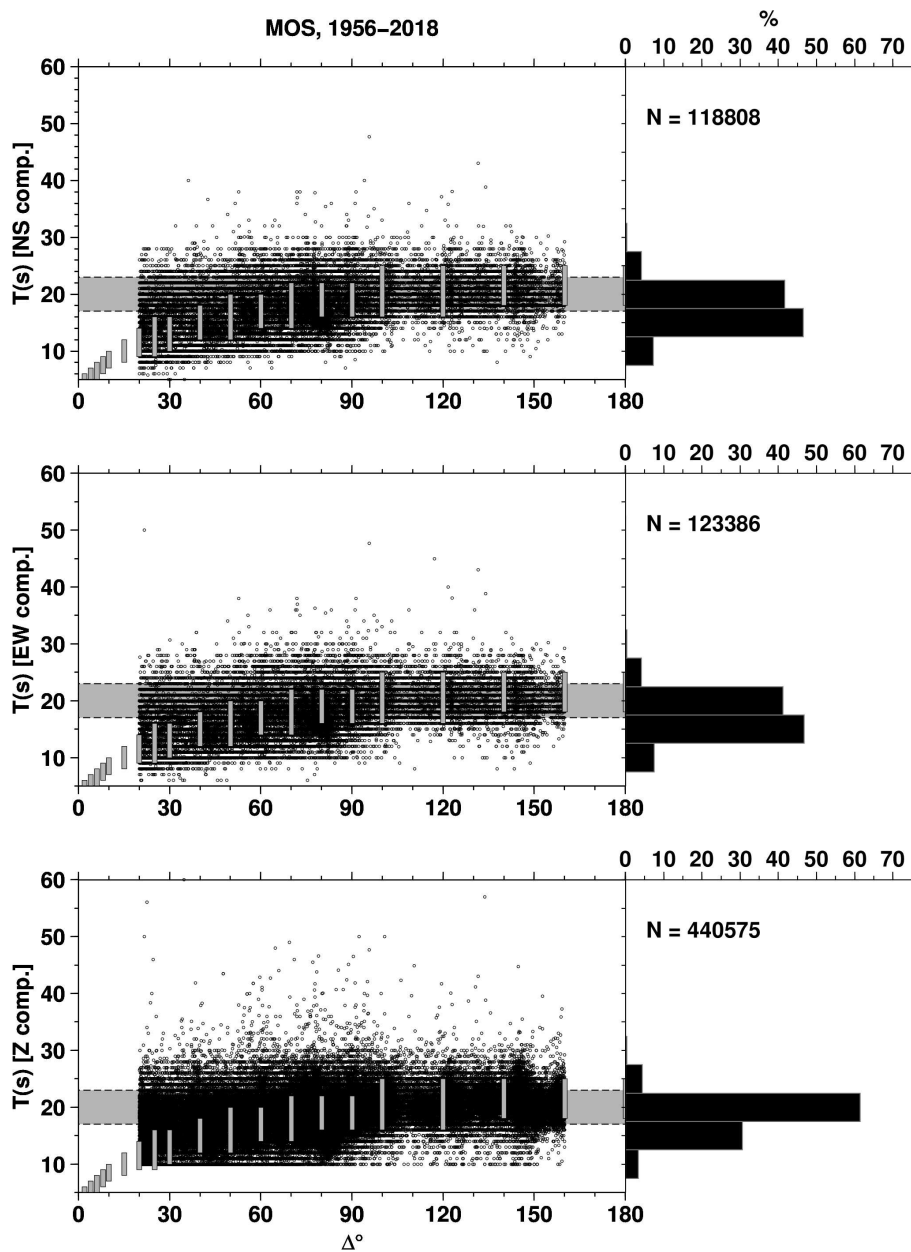

**Figure A3.** As for Fig. 7 but for reporter MOS.

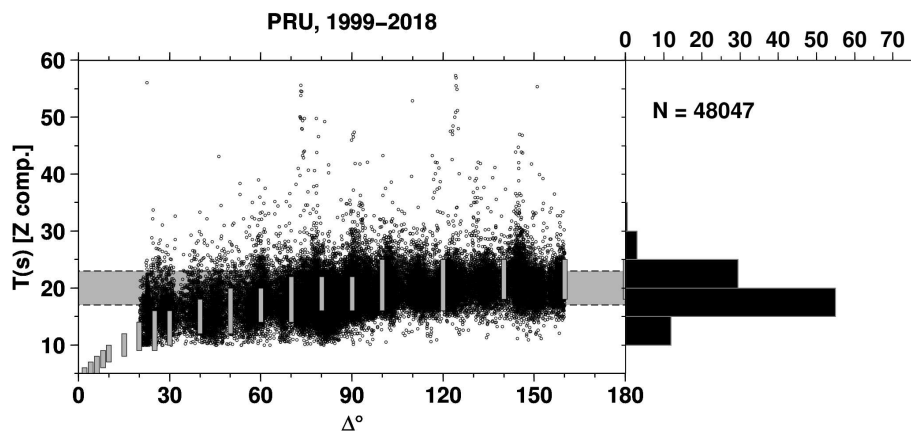

**Figure A4.** As for Fig. 7 but for reporter PRU, vertical component only.

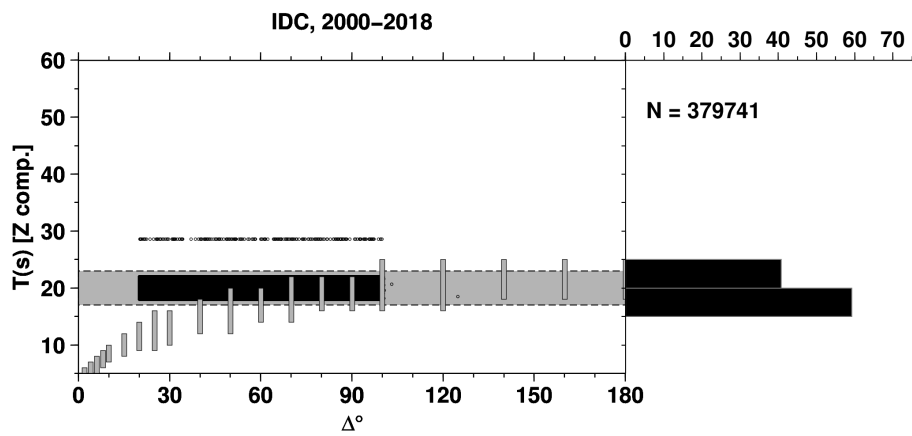

**Figure A5.** As for Fig. 7 but for reporter IDC, vertical component only.



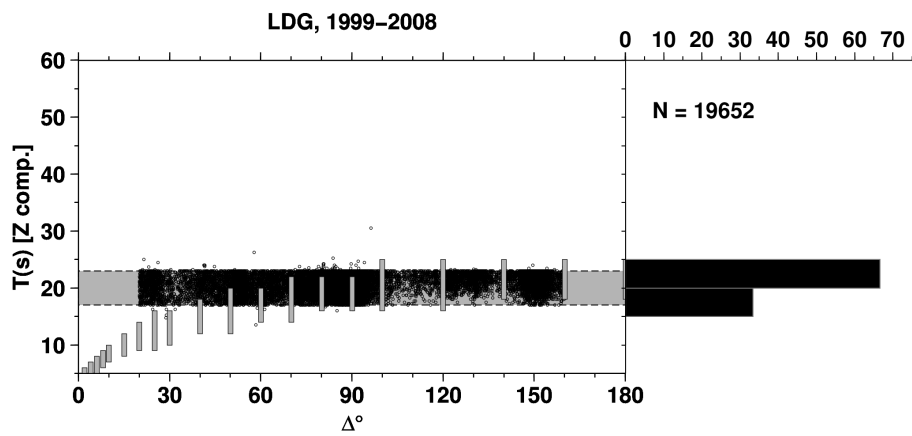

**Figure A6.** As for Fig. 7 but for reporter LDG, vertical component only.

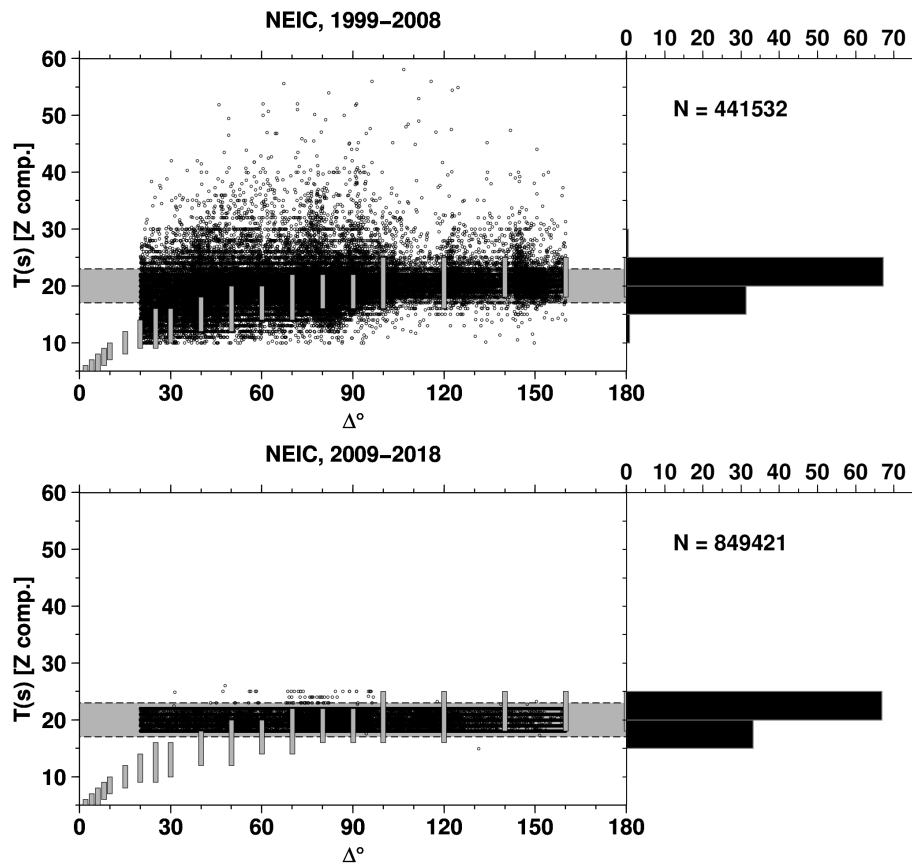

**Figure A7.** As for Fig. 7 but for reporter NEIC, vertical component only. Here we split the plot in two time periods to emphasize the change in 2009 by NEIC in reporting surface wave amplitudes strictly around 20 seconds

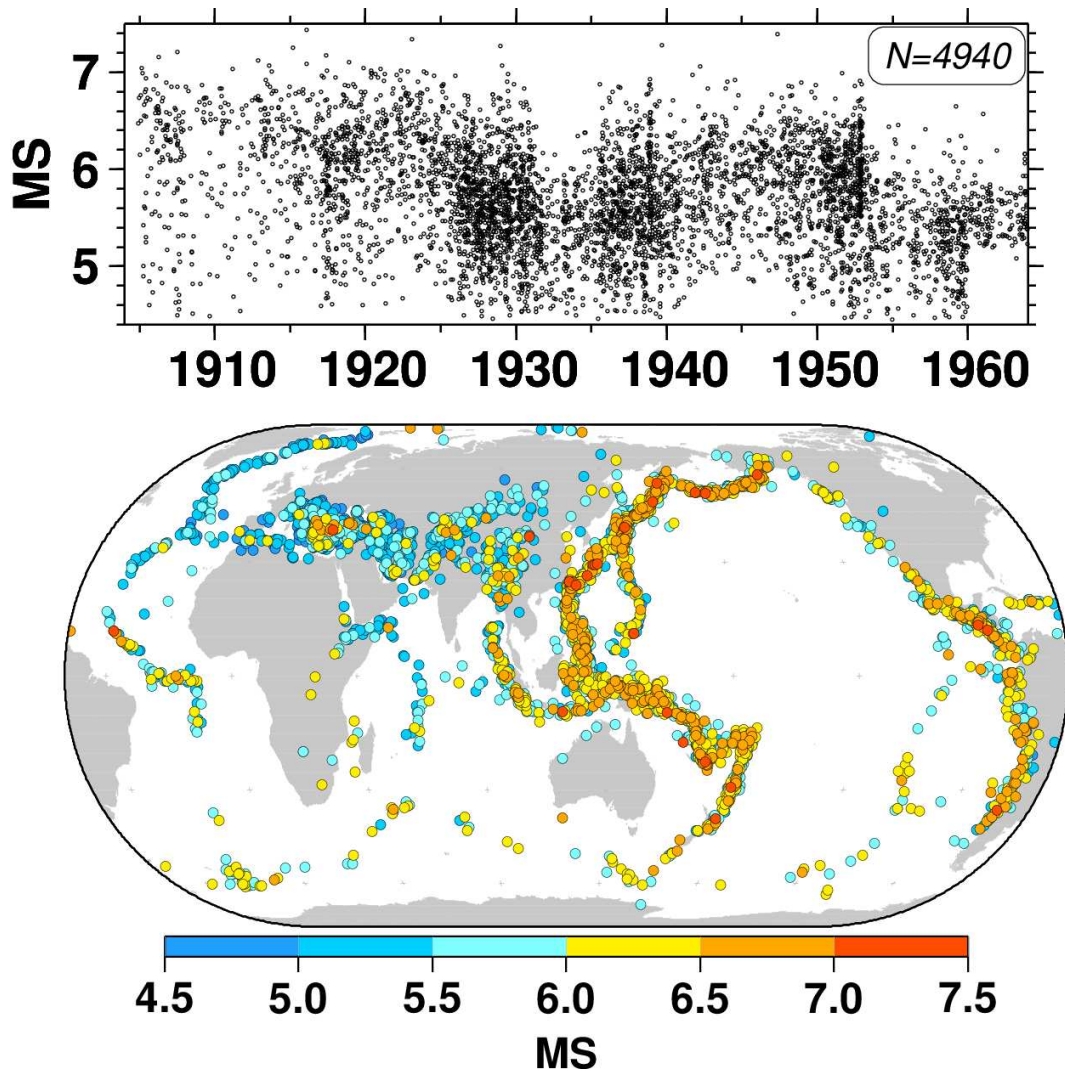

**Figure A8.** Map colour-coded by *MS* and timeline of the pre-1964 earthquakes where, according to our records, *MS* has been computed for the first time. Map drawn using the Generic Mapping Tools (GMT) (Wessel et al., 2013) software.

**Table A1.** Examples of  $M_w < 8.2$  earthquakes characterized by large differences between  $M_w$  and  $M_S$ .  $M_w$  is from literature for pre-1976 earthquakes, GCMT otherwise. The last column is the ISC event identifier.

| $M_w \ll M_S$ | Origin Time (UTC)   | Lat.   | Long.   | $M_w$ | $M_S$ | ISC_evid |
|---------------|---------------------|--------|---------|-------|-------|----------|
|               | 1906-04-18 13:12:26 | 38.04  | -122.40 | 7.70  | 8.61  | 16957905 |
|               | 1915-10-03 06:53:21 | 40.27  | -117.58 | 6.80  | 7.61  | 913944   |
|               | 1927-03-07 09:27:41 | 35.56  | 134.99  | 7.00  | 7.82  | 909128   |
|               | 1969-07-18 05:24:45 | 38.35  | 119.51  | 6.90  | 7.72  | 807162   |
|               | 1970-05-27 19:05:37 | 40.27  | 143.03  | 5.90  | 6.85  | 796053   |
| $M_w \gg M_S$ | Origin Time (UTC)   | Lat.   | Long.   | $M_w$ | $M_S$ | ISC_evid |
|               | 1940-12-28 16:37:44 | 18.20  | 147.46  | 7.70  | 6.60  | 901750   |
|               | 1954-08-27 10:54:55 | 23.99  | 143.02  | 7.20  | 6.23  | 891003   |
|               | 1983-01-13 09:23:49 | -35.83 | -102.88 | 6.12  | 5.10  | 584568   |
|               | 1995-05-26 03:11:15 | 11.89  | 58.02   | 6.46  | 5.42  | 106101   |
