# Supplementary material for: 100+ years of recomputed surface wave magnitude of shallow earthquakes
Source: Copernicus journal article supplement (doi:10.5194/essd-2021-266), 2021-08-17
Supplement: Supplementary file [file essd-2021-266-CC1-supplement.pdf]

In the line 69

$$\left(\frac{A}{T}\right)_H = \sqrt{2 * \left(\frac{A}{T}\right)_{N|E}^2} \quad \text{must be} \quad \left(\frac{A}{T}\right)_H = \sqrt{2 * \left(\frac{A}{T}\right)_{N|E}^2}$$

Value is too large as it is in the case of  $(A/T)_N=(A/T)_E$ .

Another concern is if only one component was reported, it might be possible that the larger value of  $A/T_N$  or  $A/T_E$  was chosen in the report. In the early days of the observation in Japan, stations reported the amplitudes of both horizontal components, but the central office chose only one of the larger component to fill out the central report for labor saving.

The JMA magnitude is determined by the Tsuboi's formula (1959) as

$$M_{JMA} = 1.73 \log \Delta + \log \sqrt{(A_N^2 + A_E^2)} - 0.83.$$

Taking into account situation of the observation Utsu(1979) applied  $(\sqrt{2}-0.05) * \log(A_{max})$  instead of  $\sqrt{2} * \log(A_{max})$  for magnitude determination of earthquakes in the early period of observation in his study.

Based on the comparison of  $\sqrt{(A_N^2 + A_E^2)}$  with  $\sqrt{A_{Max}^2}$  for about thousand cases, Hamada et al. (2001) adopted 1.25 instead of  $\sqrt{2}$  for their study. These differences are at most 0.1 in M, but I think they are worth commenting on here.

Sorry for the following my references are all in Japanese.

Tsuboi C. (1959) Determination of the GUTENBERG-RICHTER'E Magnitude of Earthquakes occurring in and near Japan, Zisin, 2, Vol 7, 185-193.

[https://www.jstage.jst.go.jp/article/zisin1948/7/3/7\\_3\\_185/\\_pdf](https://www.jstage.jst.go.jp/article/zisin1948/7/3/7_3_185/_pdf)

Utsu T.,1979, Seismicity of Japan from 1885 through 1925 : A New Catalog of Earthquakes of M=6 Felt in Japan and Smaller Earthquakes Which Caused Damage in Japan, Bul.Earth.Res.Inst.,Vol54, 253-308.

<https://repository.dl.itc.u-tokyo.ac.jp/record/33106/files/ji0542002.pdf>

Hamada N. et al. (2001) A Comprehensive Study of Aftershocks of the 1923 Kanto Earthquake, Zisin, 2, Vol 54, 251-265.

[https://www.jstage.jst.go.jp/article/zisin1948/54/2/54\\_2\\_251/\\_pdf](https://www.jstage.jst.go.jp/article/zisin1948/54/2/54_2_251/_pdf)
